1 **Plasticity of the *MFS1* promoter leads to multi drug resistance in the wheat**  
2 **pathogen *Zymoseptoria tritici***

3 Selim Omrane<sup>1</sup>, Colette Audéon<sup>1</sup>, Amandine Ignace<sup>1</sup>, Clémentine Duplaix<sup>1</sup>, Lamia Aouini<sup>2</sup>,  
4 Gert Kema<sup>2</sup>, Anne-Sophie Walker<sup>1</sup> & Sabine Fillinger<sup>1\*</sup>

5 (1) *UMR BIOGER, INRA, AgroParisTech, Université Paris-Saclay, 78850 Thiverval-Grignon,*  
6 *France*

7 (2) *Wageningen University, Plant Research International, 6700 AA Wageningen, The*  
8 *Netherlands*

9

10 \*Correspondence: Sabine Fillinger; UMR BIOGER; INRA, AgroParisTech; av. Lucien  
11 Brétignières; 78850 Thiverval-Grignon, France; phone: +33-1-3081-4565; e-mail:  
12 Sabine.Fillinger@inra.fr

13

14 **Abstract**

15 The ascomycete *Zymoseptoria tritici* is the causal agent of septoria leaf blotch on wheat.  
16 Disease control relies mainly on resistant wheat cultivars and on fungicide applications. The  
17 fungus displays a high potential to circumvent both methods. Resistance against all unisite  
18 fungicides has been observed over decades. A different type of resistance has emerged among  
19 wild populations with multi-drug resistant (MDR) strains. Active fungicide efflux through  
20 overexpression of the major-facilitator gene, *MFS1*, explains this emerging resistance  
21 mechanism. In this study, we identified as responsible mutations three types of inserts in the  
22 *MFS1* promoter, two of which harboring potential transcription factor binding sites. We show,  
23 that type I insertion leads to *MFS1* overexpression and consequently to MDR. Interestingly,  
24 all three inserts correspond to repeated elements of the *Z. tritici* genome.

25 These results underline the plasticity of repeated elements leading to fungicide resistance in *Z.*  
26 *tritici* and which contribute to its adaptive potential.

27

## 28 **Introduction**

29 Wheat is the most widely grown crop in the world. It is subject to several diseases, principally  
30 due to fungal pests. Its major disease in Europe and North-America is septoria leaf blotch  
31 (SLB) caused by *Zymoseptoria tritici* (formerly *Mycosphaerella graminicola*) (Fones & Gurr,  
32 2015, Torriani *et al.*, 2015). The disease pressure of SLB depends on epidemical and  
33 environmental factors (Suffert *et al.*, 2011) and can be reduced by adapted agronomical  
34 practices (e.g., crop rotation) and intelligent use of less susceptible varieties (Brown *et al.*,  
35 2015). Finally, SLB prevention strongly relies on the application of fungicides, namely  
36 inhibitors of sterol demethylation (DMIs, including azoles), inhibitors of mitochondrial  
37 complex II (SDHIs) and the multisite inhibitor chlorothalonil. According to disease pressure,  
38 spray programs targeting SLB range from one (Southern Europe) to four (Ireland and UK)  
39 sprays and around two treatments/year in France. The first treatment generally includes  
40 mixtures of azoles and chlorothalonil. The second spray aims to protect the key stage when  
41 the first leaf is emerging. Mixtures of azoles and SDHIs are often applied.

42 *Z. tritici* populations have developed resistance to all unisite fungicides, but to different  
43 extends. Azole resistance is generalized in Europe since the 1990s and now affects field  
44 efficacy of the molecules, but SDHI resistance has just emerged and does not entail yet the  
45 efficacy of this mode of action (Lucas *et al.*, 2015). Resistance is principally due to target site  
46 modification or overexpression (Cools & Fraaije, 2013, Fraaije *et al.*, 2011, Leroux &  
47 Walker, 2011).

48 Multi drug resistance (MDR) operating through increased drug efflux is a resistance  
49 mechanism recently detected in some field isolates of *Z. tritici*. Since it is associated to azole  
50 target site resistance, it confers high resistance factors to this class of inhibitors, whereas only  
51 low resistance levels towards SDHIs are recorded (Leroux & Walker, 2011).

52 The phenomenon of MDR is well known from human cancer cells and antibiotic resistant  
53 bacteria (Wu *et al.*, 2014, Hiramatsu *et al.*, 2014). In fungi, *Saccharomyces cerevisiae* has  
54 served as model organism to elucidate MDR (also termed PDR for “pleiotropic drug  
55 resistance”) and its regulation. It has also been extensively studied in several pathogenic yeast  
56 species, e.g., *Candida albicans* and *C. glabrata*. For reviews we refer the reader to some  
57 excellent papers (Gulshan & Moyer-Rowley, 2007, Moyer-Rowley, 2003, Paul & Moyer-  
58 Rowley, 2014, Cannon *et al.*, 2009, Morschhäuser, 2010). Globally, MDR is conferred to by  
59 constitutive overexpression of membrane transporter genes either of the ATP-binding cassette  
60 (ABC) type or of the major facilitator superfamily (MFS). These transporters expulse drugs  
61 outside the cell, thereby reducing the intracellular drug concentrations. Their specificity can  
62 be more or less broad (Higgins, 2007). Constitutive overexpression of membrane transporters  
63 in clinical isolates of *C. albicans* was found to be due to gain-of-function mutations in the  
64 transcription factors Tac1 or Mrr1, controlling respectively the expression of the ABC  
65 transporter gene *CDR1* or of the MFS protein encoding *MDR1* gene.

66 In the phytopathogenic fungi, *Botrytis cinerea*, *Sclerotinia homeocarpa* and *Oliculimacula*  
67 *yallundae* MDR has also been described for field isolates (Chapeland *et al.*, 1999, Leroux *et*  
68 *al.*, 1999, Hulvey *et al.*, 2012, Sang *et al.*, 2015, Leroux *et al.*, 2013). The mutations  
69 responsible for MDR in *B. cinerea* field strains have been identified. They correspond either  
70 to a retro-element like insert in the promoter of the *BcmfsM2* gene or to gain of function  
71 mutations in the transcription factor Mrr1 controlling the expression of the ABC transporter  
72 gene *BcatrB* (Kretschmer *et al.*, 2009, Leroch *et al.*, 2013). Strains harboring either or both  
73 mutations are frequent among *B. cinerea* wild populations (Walker *et al.*, 2013, Leroch *et al.*,  
74 2013, Rupp *et al.*, 2016).

75

76 In a recent study we have shown that fungicide efflux was at work in two *Z. tritici* MDR field  
77 isolates (Omrane *et al.*, 2015). Both strains, as well as other MDR strains tested,  
78 constitutively overexpress the gene *MFS1* (originally named *MgMFS1* for *Mycosphaerella*  
79 *graminicola* *MFS1*) encoding an MFS transporter, capable to transport a wide diversity of  
80 molecules (Roohparvar *et al.*, 2008). Its inactivation in one MDR strain abolished the MDR  
81 phenotype revealing that the MFS1 protein is necessary for the MDR phenotype at least in  
82 this strain. In both analyzed MDR strains, a 519 bp insert was detected in the *MFS1* promoter,  
83 a putative reminiscence of an ancient LTR-retrotransposon. Other, but not all field MDR  
84 strains, proved to have this promoter insert as well, suggesting a potential role in MDR  
85 (Omrane *et al.*, 2015). In this study we address the question of the mutations responsible for  
86 the MDR phenotype in the previously characterized MDR strains.

87

88 We used Bulk Segregant Analysis (BSA) in order to map mutations responsible for MDR in *Z.*  
89 *tritici*. BSA is a genotyping method adapted to monogenic traits (Michelmore *et al.*, 1991). It  
90 is based on the establishment of two phenotypically dissimilar pools derived from an  
91 offspring population. These pools are genotyped and markers linked to the phenotype  
92 according to their allelic frequencies are selected to determine the locus of interest. With the  
93 rise of Next Generation Sequencing (NGS), statistical tools have been developed for BSA  
94 phenotyping to uncover QTLs (Magwene *et al.*, 2011, Duitama *et al.*, 2014) and others (Liu *et*  
95 *al.*, 2012). BSA has been applied to identify genomic *loci* contributing to natural  
96 polymorphism (Leeuwen *et al.*, 2012) or mutant phenotypes (Duveau *et al.*, 2014). In fungi  
97 the combination of BSA, was successfully used to identify mutations responsible for cell  
98 cycle and developmental processes respectively in *Neurospora crassa* (Pomraning *et al.*,  
99 2011) and *Sordaria macrospora* (Nowrousian *et al.*, 2012). Due to its haploid, characterized  
100 and annotated genome (Goodwin *et al.*, 2011) and the possibility to perform sexual crosses

101 between different strains (Kema *et al.*, 1996), *Z. tritici* is suitable to BSA to map the  
102 mutation(s) responsible for the MDR phenotypes.

103 In this work we mapped the mutation responsible for the MDR phenotype in the two  
104 previously characterized field strains using BSA. After functional validation of the  
105 responsible mutation, the 519 bp promoter insert of the *MFS1* gene, we screened *Z. tritici*  
106 field strains for the *MFS1* promoter genotype. Interestingly two other inserts were identified  
107 in the same promoter only in *Z. tritici* MDR field strains overexpressing *MFS1*.

108

## 109 **Materials & Methods**

110 Table 1: *Zymoseptoria tritici* field strains used in this study

| <b>Name</b>         | <b>Fungicide sensitivity profile<sup>a</sup></b> | <b><i>MFSI</i> insert</b> |
|---------------------|--------------------------------------------------|---------------------------|
| <b>IPO323</b>       | sensitive                                        | none                      |
| <b>IPO94269</b>     | BenR                                             | none                      |
| <b>09-ASA-3apz</b>  | TriR StrR BenR MDR                               | type I                    |
| <b>09-CB1</b>       | TriR StrR BenR MDR                               | type I                    |
| <b>SYN20</b>        | sensitive                                        | none                      |
| <b>07-S6</b>        | sensitive                                        | none                      |
| <b>07-S46</b>       | sensitive                                        | none                      |
| <b>SYN33</b>        | sensitive                                        | none                      |
| <b>14-AK-1a</b>     | TriR StrR BenR                                   | none                      |
| <b>15-OM-4A</b>     | TriR StrR BenR                                   | none                      |
| <b>12-AGC-13C</b>   | TriR StrR BenR                                   | none                      |
| <b>12-VM-4F</b>     | TriR StrR BenR                                   | none                      |
| <b>ST-5548</b>      | n.d. <sup>b</sup>                                | none                      |
| <b>14-AQ-1</b>      | TriR StrR BenR                                   | none                      |
| <b>14-STIRLO-13</b> | TriR StrR BenR CarR                              | none                      |
| <b>15-PN-3</b>      | TriR StrR BenR CarR                              | none                      |
| <b>STDP-04915</b>   | TriR StrR BenR CarR                              | none                      |
| <b>15-OU-1D</b>     | TriR StrR BenR                                   | none                      |
| <b>15-PQ-8B</b>     | TriR StrR BenR MDR                               | type III                  |
| <b>15-PQ-2B</b>     | TriR StrR BenR MDR                               | type III                  |
| <b>14-MAFL-08</b>   | TriR StrR BenR MDR                               | type II                   |
| <b>14-AK-1b</b>     | TriR StrR BenR MDR                               | type II                   |
| <b>12-VM-4J</b>     | TriR StrR BenR MDR                               | type II                   |
| <b>14-STDO.28.2</b> | TriR StrR BenR CarR MDR                          | type II                   |
| <b>12-VM-5A</b>     | TriR StrR BenR MDR                               | type II                   |
| <b>12-VM-5C</b>     | TriR StrR BenR MDR                               | type II                   |
| <b>12-VM-5F</b>     | TriR StrR BenR MDR                               | type II                   |
| <b>12-VM-5E</b>     | TriR StrR BenR MDR                               | type I                    |
| <b>13-AHJ-8C</b>    | TriR StrR BenR MDR                               | type I                    |
| <b>14-EG-A1</b>     | TriR StrR BenR MDR                               | type I                    |
| <b>15-OM-5</b>      | TriR StrR BenR MDR                               | type I                    |
| <b>12-VM67A</b>     | TriR StrR BenR MDR                               | type I                    |
| <b>10-BNE35</b>     | TriR StrR BenR MDR                               | type I                    |
| <b>14-STDK</b>      | TriR StrR BenR MDR                               | type I                    |
| <b>15-PQ-6A</b>     | TriR StrR BenR MDR                               | type I                    |
| <b>09-ASA-10bpz</b> | MDR <sup>c</sup>                                 | type I                    |
| <b>12-VM7A</b>      | TriR StrR BenR MDR                               | type I                    |

111 <sup>a</sup> Resistance phenotypes indicated are TriR=triazole resistance (any phenotype specifically resistant to DMIs),  
 112 StrR=strobilurine resistance, BenR=benzimidazole resistance, CarR=carboximide resistance, MDR=multi drug  
 113 resistance. Establishment of phenotypes were performed as published in (Leroux & Walker, 2011).

114 <sup>b</sup> not determined

115 <sup>c</sup> specific resistance phenotypes not determined

116

117 *Z. tritici* strains and growth conditions

118 All *Z. tritici* field strains used in this study are listed in Table 1. As sensitive reference strains,  
119 we used IPO323 and IPO94269 displaying *MAT1-1* and *MAT1-2* genotypes respectively  
120 (Waalwijk *et al.*, 2002), and sensitive to all tested fungicides (Roohparvar *et al.*, 2007 and our  
121 unpublished results). As principal MDR strains we used 09-ASA-3apz and 09-CB01 (Omrane  
122 *et al.*, 2015, Leroux & Walker, 2011). Strains produced in this study are described below. All  
123 strains (if not otherwise indicated) were cultivated on solid YPD medium (20 g L<sup>-1</sup>  
124 Bacteriological peptone, 10 g L<sup>-1</sup> Yeast extract, 20 g L<sup>-1</sup> Glucose, 15 g L<sup>-1</sup> agar) during 7 days  
125 at 17°C in the dark. The sequence of IPO323 is publically available (Goodwin *et al.*, 2011),  
126 that of IPO94269 was kindly provided by Syngenta AG for mapping analysis.

127 To determine EC<sub>50</sub> values to prothioconazole-desthio, tebuconazole, metconazole, tolnaftate,  
128 terbinafine and pyrifenoX, conidia were collected from 3 day-old cultures on NY medium in  
129 sterile water and adjusted to a final concentration of approximately 2x10<sup>5</sup> conidia mL<sup>-1</sup>. 300  
130 µL of each solution was spread on test plates containing solid phosphate-glucose medium (2 g  
131 L<sup>-1</sup> K<sub>2</sub>HPO<sub>4</sub>; 2 g L<sup>-1</sup> KH<sub>2</sub>PO<sub>4</sub>; 10 g L<sup>-1</sup> glucose, 12.5 g L<sup>-1</sup>) with 5 fold serial dilutions (2.5 fold)  
132 of prothioconazole-desthio (Sigma-Aldrich, Saint Quentin Fallavier, France) tebuconazole  
133 (technical grade, BayerCropScience, Germany), metconazole (technical grade, BASF Agro,  
134 Germany), tolnaftate (Sigma-Aldrich), terbinafine (technical grade, Sandoz, Switzerland) and  
135 pyrifenoX (technical grade, Syngenta Agro, Switzerland) as described by (Leroux & Walker,  
136 2011). All fungicides were supplied as 250x concentrated ethanol-solutions. Test and control  
137 plates were incubated at 17°C in the dark for 48 h. The length of germ-tube was estimated  
138 microscopically on 10-30 spores per plate. The EC<sub>50</sub> value of each tested fungicide  
139 corresponding to the concentration inhibiting spore germination by 50% was determined by  
140 non-linear regression (least squared curve fitting) using the GraphPad PRISM program,  
141 (GraphPad software, La Jolla, CA, USA).



142 *Crosses and progeny phenotyping*

143 Crosses 1 (09-ASA-3apz x 09-CB1), 2 (09-ASA-3apz x IPO94269) and 3 (09-CB1 x IPO323)  
144 were performed as described previously (Kema *et al.*, 1996). Single spore progenies were  
145 isolated from ascii. A set of 20 progeny strains from each cross were checked by genotyping  
146 of 11 SSRs on the core chromosomes (Gautier *et al.*, 2014) in comparison to their parents to  
147 validate the absence of external contaminants prior to all subsequent analyses. The whole  
148 offspring was genotyped using a set of eight SSRs. Only strains presenting single bands were  
149 conserved.

150 Sensitivity tests to distinguish MDR from sensitive offspring were performed in solid as well  
151 as in liquid YPD medium with the addition of tolnaftate ( $2 \mu\text{g mL}^{-1}$ ,  $5 \mu\text{g mL}^{-1}$  or  $10 \mu\text{g mL}^{-1}$ ).  
152 All strains were grown on solid YPD for one week ( $18^\circ\text{C}$ ; continuous light) and transferred  
153 by toothpicks to a 96-well microtiter-plate into  $200 \mu\text{L}$  sterile water.  $10 \mu\text{L}$  of 1/100 dilutions  
154 was spotted on 96 microtiter plates filled with YPD (liquid) with and without tolnaftate. The  
155 plates were incubated on a rotary shaker at  $18^\circ\text{C}$  during 11 days. Scoring of growth was made  
156 by O.D. measurement ( $\lambda = 590$  and  $620 \text{ nm}$ ) at 3, 6 and 11 days. Growth rates at days 6 and 11  
157 were calculated relative to day 3 and as a ratio of treated *vs.* untreated conditions. The whole  
158 assessment procedure was repeated three times.

159

160 *Progeny bulk preparation*

161 Resistant (MDR phenotypes) and sensitive sets (sensitive phenotypes) of strains were selected  
162 on the basis of the phenotyping described above among those that grew or not on  $5 \mu\text{g mL}^{-1}$  of  
163 tolnaftate to build bulks for each of the progenies (crosses 2 and 3) before nucleic acid  
164 extraction. The number of strains for the DNA bulks was respectively  $n = 60$  for R2 and S2

165 (resistant and sensitive bulks, respectively from cross 2), n = 50 for R3 and S3 (resistant and  
166 sensitive bulks, respectively from cross 3). The phenotype of all selected strains was verified  
167 on tolnaftate ( $5 \mu\text{g mL}^{-1}$ ) by growth tests on solid and liquid medium. Additionally, liquid  
168 growth tests were performed with or without the addition of reversal agents namely  
169 amitriptyline, chlorpromazine and verapamil (Sigma-Aldrich) at a 1:3 ratio ( $5 \mu\text{g mL}^{-1}$   
170  $^1$ tolnaftate,  $15 \mu\text{g mL}^{-1}$ reversal agents).

171 For DNA extraction each strain was grown individually in liquid YPD during 1 week on a  
172 rotary shaker (140 rpm;  $18^\circ\text{C}$ ). Cultures were harvested by centrifugation (4000 rpm during  
173 10 min.), rinsed twice with cold PBS 1X (Sigma-Aldrich, Saint-Quentin, France) and  
174 immediately frozen in liquid nitrogen prior to vacuum-freeze-drying. DNA were extracted  
175 from freeze dried cells using the DNeasy Plant maxi kit (Qiagen) for. The concentrations  
176 were determined and the quality verified on a 2100 Bioanalyzer (Agilent). Identical amounts  
177 (200 ng) of genomic DNA of each strain were mixed to constitute the bulks R2, S2, R3 and  
178 S3.

179

### 180 *Sequencing and mapping to reference genome*

181 100 base paired-end Illumina sequencing was performed on  $2 \mu\text{g}$  of DNA of each bulk as well  
182 as for the MDR progenitors by the sequencing provider (Beckman-Coulter). The total number  
183 of reads used for genome mapping was 32269.4 Mb distributed equally among the DNA  
184 samples (Table S1). These were mapped respectively on reference genome sequences of the  
185 sensitive parental strains IPO94269 (reads from 09-ASA-3apz and R2, S2 bulks) or IPO323  
186 (09-CB1 and R3, S3 bulks) by the sequencing provider, using Bwa 0.6.1 (Li & Durbin, 2009)  
187 for alignment and the GATK GenomeAnalysis module (McKenna *et al.*, 2010) for local  
188 realignment. Variants were called with Samtools 1.18 (Li *et al.*, 2009) using default

189 parameters. The GATK Unified Genotyper (McKenna *et al.*, 2010) was used to call all  
190 locations of allele frequencies. For 09-CB1 and R3, S3 bulks, snpEff 3.0 was used to call  
191 effects for filtered variants. Finally, VarSifter 1.5 (Teer *et al.*, 2012) was used to inspect final  
192 genotype calls for coherence. IGV 2.3 (Robinson *et al.*, 2011) was used to visualize the  
193 polymorphisms (SNPs and INDELs) per cross project respectively. For cross 2 only contigs  
194 of IPO94269 over 200bp were used as reference sequences. For cross 3 the JGI Mycgr3  
195 genome (<http://genome.jgi.doe.gov/Mycgr3/Mycgr3.home.html>) was used together with the  
196 “FrozenGeneCatalog20080910” gene predictions.

197 Alignments of both reference sequences were performed by MAUVE (Darling *et al.*, 2004).  
198 Reads’ quality cutoff and read depth were respectively set to  $\geq 20$  and  $\geq 5$ . Final filtering  
199 parameters to detect the genomic distortions were set as GQ scores (encoded as a phred  
200 quality) for each genotype as  $\geq 0.5$  for resistant bulks and  $< 0.5$  for sensitive bulks, while the  
201 parental genotypes were set as = 1 (MDR) and 0 (Sensitive reference sequence). The  
202 difference between R and S bulk genotypes (D value) was filtered as  $\geq 0.4$ . Blastn of contig  
203 sequences were made at <http://genome.jgi-psf.org/pages/blast.jsf?db=Mycgr3> using *M.*  
204 *graminicola* v2.0 unmasked nuclear assembly as search criteria.

205

## 206 *Genotyping of progeny strains*

### 207 *MFS1* promoter

208 Screening for the 519 bp insert in the *MgMFS1* promoter (Omrane *et al.*, 2015) among all  
209 progeny strains was performed by PCR using the primer couple MFS1\_2F and MFS1\_4R  
210 (Table S2). No promoter insert lead to a 486 bp amplicon while the insert increased the  
211 amplicon size to 1005 bp.

212

213 *NFX1*, *PYC* polymorphism

214 The genotypes of the *NFX1* and *PYC* genes located at both ends of contig 1135 of the  
215 IPO94269 genome sequence were determined on the progeny strains by HRM in comparison  
216 to the parental strains. The primer couples *NFX1*\_11422FW / *NFX1*\_11422RV and  
217 *PYC*\_5UTR\_FW / *PYC*\_5UTR\_RV (Table S2) showing close to 100% amplification  
218 efficiency on serial DNA dilutions of the parental strains were used for HRM comparisons  
219 under the following conditions. In a total volume of 25  $\mu$ L, 5 ng of genomic DNA was  
220 analyzed with 300 nM of both primers using SsoFast™ Evagreen® Supermix (Bio Rad,  
221 Marnes-la-Coquette) at 1x. The cycling parameters were 98°C for 2 min followed by 40  
222 cycles of 98°C for 2 sec and 60°C for 5 sec. The high resolution melt curve was established  
223 between 70°C and 95°C with 0.2°C increments every 10 sec in a CFX-384 Real-Time PCR  
224 System (Bio Rad). Melting curve normalization and differentiation was performed using  
225 Precision Melt Analysis Software (Bio Rad).

226

227 *MFS1* expression analysis

228 For *MFS1* expression during exponential growth, the tested strains (field strains, offspring,  
229 transformants) were grown in liquid YPD (5 mL) at 18°C and 140 rpm during 48-72 h. The  
230 cell concentration was determined microscopically with a hemacytometer and diluted in 100  
231 mL of YPD to a final concentration of  $5 \times 10^4$  cells/mL and incubated for 48 h at 18°C, 140  
232 rpm to a final cell concentration of  $5 \times 10^6$  cells/mL. The cultures were harvested by  
233 centrifugation (6500 rpm, 4°C during 20 min), the pellet immediately frozen in liquid  
234 nitrogen and freeze-dried.

235 Total RNA was extracted from the freeze-dried mycelium using the RNeasy Plant Mini kit  
236 (Qiagen) according to the supplied instructions. Quality of the RNA was checked by  
237 electrophoresis, the concentration determined spectrophotometrically (NanoDrop™,  
238 ThermoScientific™). 1  $\mu$ g of total RNA was used for cDNA synthesis using the  
239 PrimeScript™ RT Reagent Kit with gDNA Eraser (Takara). cDNAs were diluted 5 times  
240 before qPCR analysis with MESA GREEN qPCR MasterMix Plus for SYBR® Assay  
241 (Eurogentec, Angers, France). The MFS1 amplicon was obtained with primers 110044\_Fw  
242 and 110044\_RV which had been verified by standard curves for amplification efficiencies  
243 ranging from 95% to 105 % and for the absence of non-specific amplicons. Relative  
244 expression levels were determined according to using the  $2^{-\Delta C(t)}$  and the bestkeeper method  
245 (Pfaffl *et al.*, 2004) with *EF1 $\alpha$* ,  *$\beta$ -tubulin* and *UBC1* as control genes to establish the most  
246 stable value of housekeeping gene expression among all experimental conditions. Means and  
247 standard deviations were calculated from two technical replicates of two biological replicates.  
248 All primer sequences are listed in Table S2.

249

#### 250 *MFS1 gene replacement constructs*

251 To introduce the various *MFS1<sup>MDR</sup>* alleles into the sensitive IPO323 strain, the following  
252 replacement cassettes were constructed. The respective *MFS1* allele, 1380 bp upstream until  
253 518 bp downstream of the ORF, was amplified from the corresponding DNA (09-ASA-3apz,  
254 09-CB01 or other MDR strains) using the primers MDR-pKr\_F at the 5' end and the strain  
255 specific primer MDR6\_hygR (09-ASA-3apz) or MDR7\_hyg R (09-CB01) at the 3' end using  
256 Q5® High-Fidelity DNA Polymerase (New England Biolabs, Evry, France). A 737 bp 3'  
257 flank of the *MFS1* gene to facilitate homologous recombination was amplified from IPO323  
258 genomic DNA with primers Ipo323-hygroF and Ipo323-pKraR. Finally the hygromycin

259 resistance marker *hph* was amplified from plasmid pCAMB-HPT-Hind (Kramer *et al.*, 2009)  
260 with the primer couples Hygro\_MDR6\_F / Hygro\_ipo323\_R or Hygro\_MDR7\_F /  
261 Hygro\_ipo323\_R respectively. The three fragments (0.06 pmol of each) were assembled with  
262 *XhoI-EcoRI* digested pCAMB-HPT-Hind (0.02 pmol) by Gibson Assembly® Cloning Kit  
263 (New England Biolabs, Evry, France) according to the supplier's instructions. Half of the  
264 assembly reaction was used to transform NEB 5-alpha competent *Escherichia coli* (New  
265 England Biolabs). The kanamycine resistant colonies were PCR-screened with the above-  
266 cited primers. Positive clones were picked for plasmid extractions according to standard  
267 protocols (Green & Sambrook, 2012). The extracted plasmids were checked again by *EcoRI*-  
268 *NcoI* restriction.

269 The resulting plasmids pCAMBIA-MFS1(MDR6) and pCAMBIA-MFS1(MDR7)  
270 respectively were introduced into *Agrobacterium tumefaciens* AGL1 competent cells by heat-  
271 shock. Transformants were selected and isolated on LB broth with rifampicin ( $20 \mu\text{g.mL}^{-1}$ ),  
272 kanamycin ( $50 \mu\text{g.mL}^{-1}$ ) and ampicillin ( $50 \mu\text{g.mL}^{-1}$ ).

273

#### 274 *Z. tritici* transformation and analysis

275 *Agrobacterium* mediated transformation procedure was performed as described by Zwiers and  
276 de Waard, (2001) according to the modifications made by Kramer *et al.*, (2009) with minor  
277 changes. Transformants were selected and isolated on hygromycin ( $100 \mu\text{g.mL}^{-1}$ ) containing  
278 YPD medium. 50 transformants for each plasmid were picked and isolated twice on selective  
279 YPD medium. All purified transformants were tested by PCR: genomic DNA was extracted  
280 from cells harvested on solid YPD medium with the GenElute™ Plant Genomic DNA  
281 Miniprep Kit (Aigma-Aldrich, Saint-Quentin Fallavier, France). Z4\_110044\_FW and  
282 Z4\_110044\_RV primers (Table S2) were used to PCR amplify the *MFS1* promoter in order to

283 distinguish transformants devoid of the insert (700 bp amplicon) from those with the insert  
284 (1200 bp amplicon) and from ectopic integrations (700 bp with additional amplicon). 16 and  
285 10 transformants respectively out of 50 (20-32%) had the *MFS1*<sup>MDR</sup> allele integrated at the  
286 *MFS1* locus of IPO323.

#### 287 Fungicide sensitivity assays of selected transformants

288 All validated transformants were tested for their sensitivity to various fungicides on solid  
289 YPD medium supplemented with tolnaftate (2  $\mu\text{g mL}^{-1}$ ), terbinafine (0.015  $\mu\text{g mL}^{-1}$ ),  
290 prochloraz (0.05  $\mu\text{g mL}^{-1}$ ), metconazole (0.02  $\mu\text{g mL}^{-1}$ ), boscalid (2  $\mu\text{g mL}^{-1}$ ), bixafen (0.5  $\mu\text{g}$   
291  $\text{mL}^{-1}$ ) and azoxystrobin (20  $\mu\text{g mL}^{-1}$ ). All fungicides were supplied as 1000x concentrated  
292 ethanol-solutions. Strains were precultered in 5 mL of liquid YPD medium during 3 days at  
293 18°C and 140 rpm. After OD<sub>600</sub> measurement, all cultures were adjusted with fresh YPD  
294 medium to the lowest measured OD. Three sequential 10-fold dilutions were prepared from  
295 all adjusted precultures. 3  $\mu\text{L}$  of precultures and dilutions were spotted on each fungicide  
296 assay and control plate and incubated at 17°C in the dark during 5 days.

297

298

## 299 Results

### 300 I. Genetic mapping of *mdr loci* in two MDR field strains

301 To check whether MDR phenotypes described in (Leroux & Walker, 2011) are driven by  
302 allelic mutations, we performed a cross between strains 09-ASA-3apz and 09-CB1. Rapid  
303 discrimination of MDR strains from sensitive ones consists in a growth test using fungicides  
304 that are not used in agriculture such as tolnaftate and terbinafine (Leroux *et al.*, 1999), both  
305 squalene epoxidase inhibitors, typically used against human fungal infections (Barrett-Bee *et*  
306 *al.*, 1986, Georgopapadakou & Bertasso, 1992). A progeny of 140 strains was analyzed on  
307 tolnaftate. Growth tests did not reveal any sensitive isolate (Table 2), suggesting that the two  
308 parental *mdr* mutations are closely linked on the same chromosome, in a common genomic  
309 region.

310 **Table 2:** Crosses used in this study. Progeny segregation into sensitive or MDR is based on  
311 sensitivity/resistance to tolnaftate 2  $\mu\text{g mL}^{-1}$ .

|   | Cross (n° / strains)                 | sensitive | MDR | Total |
|---|--------------------------------------|-----------|-----|-------|
| 1 | 09-ASA-3apz (MDR) x 09-CB1 (MDR)     | 0         | 140 | 140   |
| 2 | 09-ASA-3apz (MDR) x IPO94269 (sens.) | 149       | 148 | 297   |
| 3 | 09-CB1 (MDR) x IPO323 (sens.)        | 111       | 97  | 208   |

312 Both MDR strains were then crossed to the sequenced sensitive strains IPO94269 and IPO323,  
313 respectively. These two crosses were essential to map the *mdr loci*. We isolated and  
314 phenotyped 297 and 208 progeny strains respectively. Crosses 2 and 3 generated respectively  
315 50% and 47 % MDR progeny strains (Table 2). In both cases the ratio MDR vs. sensitive  
316 strains was in agreement with a single mutation responsible for the MDR phenotype.  
317 However, we need to underline that the selection of progeny strains was not completely  
318 unbiased after the elimination of mixtures among progeny strains. Therefore, statistical tests  
319 cannot be applied to offspring segregation.



320 To map both *mdr* mutations, we decided to perform a bulk-progeny sequencing approach  
321 (BSA) as developed for different phenotypes in other fungal species (Nowrousian *et al.*, 2012,  
322 Pomraning *et al.*, 2011). MDR and sensitive progeny strains were selected on the basis of  
323 maximal phenotypic dissimilarities by growth tests in medium supplemented with tolnaftate  
324 and the membrane transporter inhibitor, verapamil to constitute resistant (R) or sensitive (S)  
325 bulks. We adjusted the number of progeny strains per bulk to n=50 (cross 3 09-CB1 x  
326 IPO323) and n=60 (cross 2 09-ASA-3apz x IPO94629). In order to map the *mdr* mutations,  
327 we adopted a 3-step protocol (Fig.1) involving (1) DNA extraction from each of the four  
328 bulks, (2) Illumina DNA sequencing and (3) sequence mapping to the reference sequence of  
329 the parental sensitive strain.

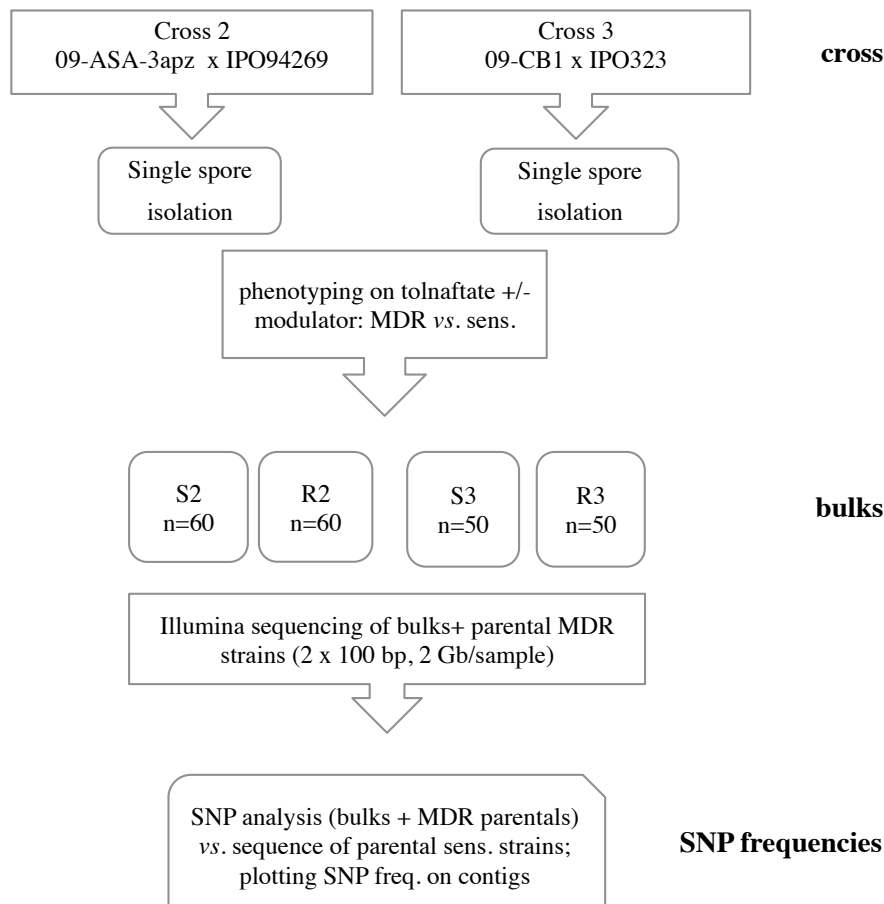

330 Fig. 1: **Flowchart of applied BSA procedure.** The bulks of progeny strains are designated S and R as sensitive  
331 or resistant respectively to tolnaftate, the numbers 2 and 3 refer to the crosses listed in Table 2.

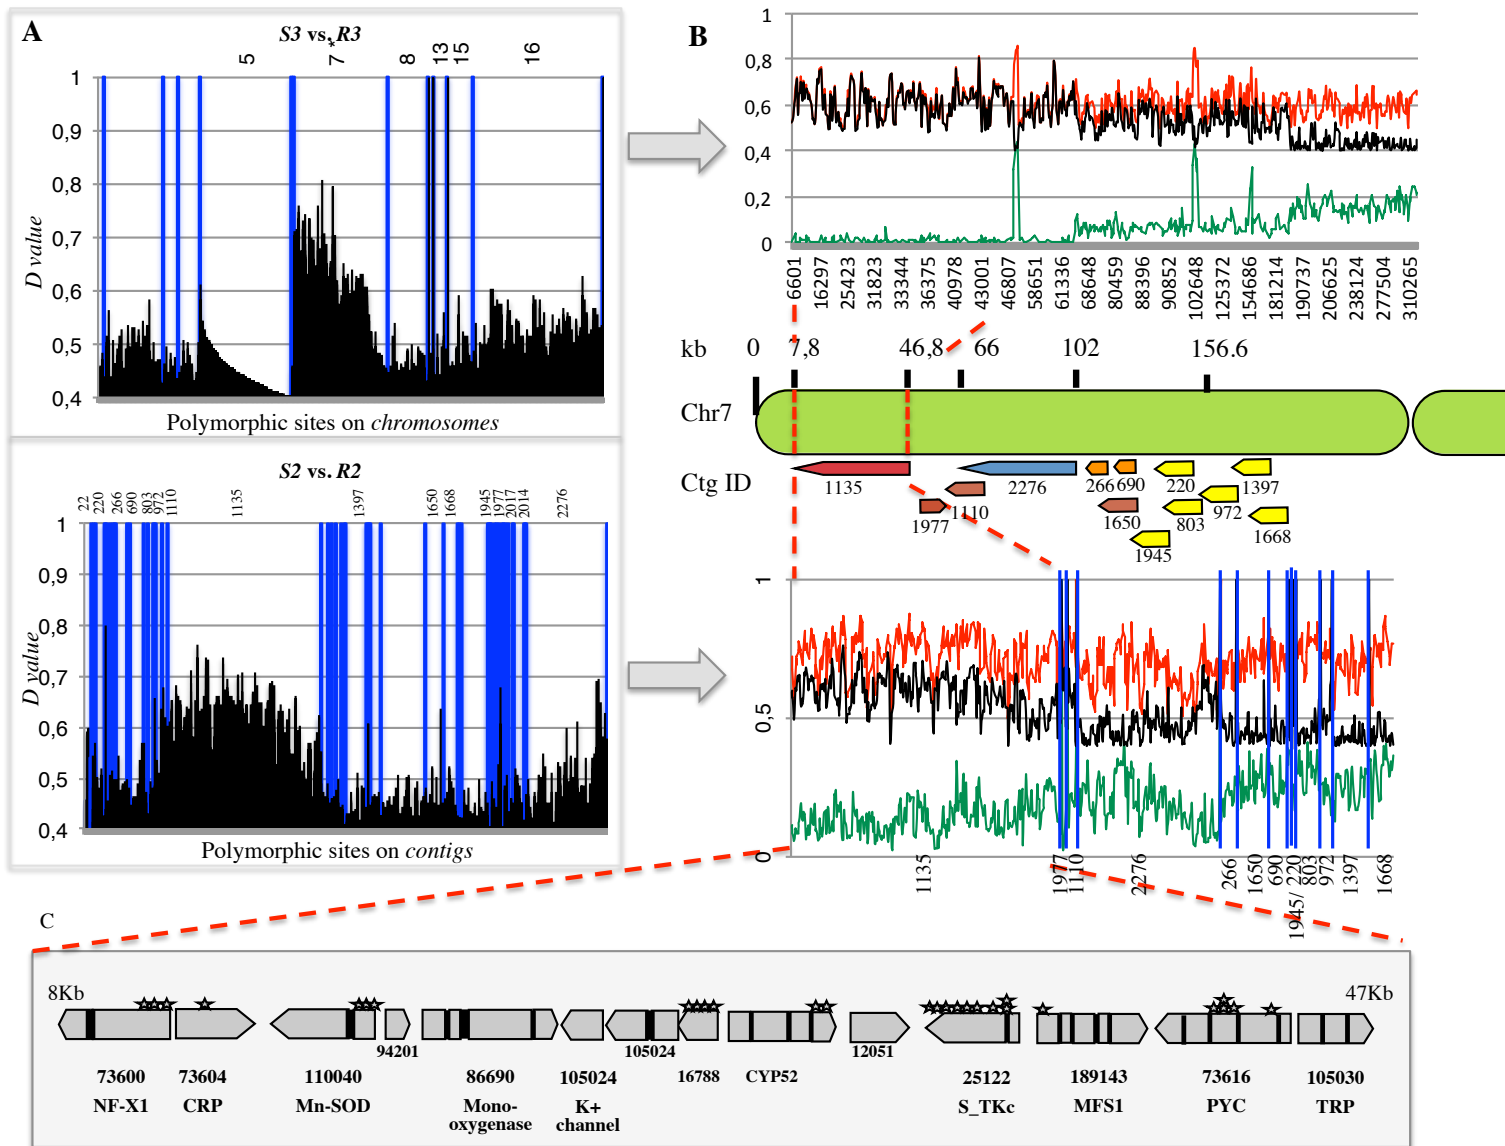

332 Fig. 2: **Polymorphism discovery in 09-CB1xIPO323 vs. 09-ASA-3apzxIPO94269 bulks.** A/ D values ( $GQ_R -$   
333  $GQ_S$ ) plotted against their chromosomes (IPO323=sensitive parent) or contigs (IPO94269=sensitive parent)  
334 derived from 09-CB1xIPO323 (upper panel) and 09-ASA-3apzxIPO94269 (lower panel). B/ Incrementing the  
335 bin size resolution of the regions concerned by the highest distortion, which shows a net increase of the D-values  
336 (black line) between resistant bulk's (red lines) and sensitive bulk's GQ scores. Contigs showing the highest  
337 distortion (containing at least one polymorphic site with D value  $\geq 0.5$ ) from the 09-ASA-3apzxIPO94269 bulk  
338 sequencing were selected and aligned against the IPO323 genome. C/ Contig 1135 matching the region  
339 extending from 8 to 47 kb of chromosome 7 with the highest D-values harbors 14 genes. SNPs and INDELS  
340 inducing non-synonymous substitutions in the coding regions are indicated by the stars.

341

342 Reads derived from each bulk and from the MDR parental strains were mapped on their  
343 respective reference sequence IPO323 (IPO323, R3 & S3 reads) and IPO94269 (09-ASA-  
344 3apz, R2 & S2 reads). Mapping procedure yielded a comparable number of polymorphic sites  
345 (more than 180000) and density for both data sets (Table S1). SNP and INDEL frequencies  
346 relative to each reference sequence were calculated and reported as GQ-value between 0 and  
347 1 (100%). We assumed that the GQ value of the region surrounding the *mdr* mutations would  
348 tend towards 1 in the resistant bulks, whereas the GQ values at the same sites would approach  
349 0 in the sensitive bulks. By applying the thresholds  $GQ \geq 0.5$  to the resistant and  $GQ \leq 0.5$  to  
350 the sensitive bulks and considering as relevant only sites with a maximum difference between  
351 both bulks ( $GQ_R - GQ_S = D$  value  $\geq 0.4$ ) we were able to reduce the bin size around the  
352 distortion to several kilobases (Fig. 2B) located on the left arm of chromosome 7 of IPO323.  
353 In the 09-CB1 x IPO323 data set, this region showed the highest distortion, decreasing from  
354 the telomere to the centromere (Fig. 2B). The strategy was merely the same in the 09-ASA-  
355 3apz x IPO94269 dataset except for the use of unassembled contigs. 13 contigs out of 56 with  
356 D values  $> 0.4$  co-localized on the left arm of chromosome 7 as well (Fig 2B), out of which  
357 contig 1135 had the highest number of polymorphic sites with the highest D values. We  
358 therefore focused our subsequent analysis on the region of chromosome 7 covered by this  
359 contig (from position 8 to 47 kb in Fig 2C). Reporting all SNPs and INDELS of the resistant  
360 bulks R2 and R3 present in this bin on the local alignment between contig 1135 and the

361 IPO323 very left arm of chromosome 7, we identified three kinds of polymorphic sites: those  
362 common to both MDR strains and those independent to each of them (Table S3). The highest  
363 detected D values were respectively recorded in the *CYP52* gene (R2&R3; D value = 0.72;  
364 synonymous substitution), in the pyruvate carboxylate gene *PYC* (R2; D value = 0.738;  
365 intron) and the manganese-iron superoxide gene *Mn-SOD* (R3; D value = 0.736; 5'UTR).  
366 Intriguingly, this region also covers the transporter gene *MFS1*, whose involvement in drug  
367 efflux and MDR was shown before (Roohparvar *et al.*, 2007, Omrane *et al.*, 2015). This gene  
368 is located between the above-mentioned polymorphic sites. In particular, the genes  
369 immediately surrounding *MFS1*, *STK* and *PYC*, harbored many polymorphic sites that co-  
370 segregated with the MDR phenotype, while the 5'UTR and 3'UTR of the *MgMFS1* gene  
371 appeared structurally highly dissimilar in the 09-ASA-3apz and 09-CB1 backgrounds from  
372 both reference sequences as stated by the dramatic decrease of mapped reads (data not  
373 shown). Indeed, we had previously found that both strains harbor a 519 bp insert in the *MFS1*  
374 promoter region (Omrane *et al.*, 2015).

375 Altogether, this BSA revealed for both MDR strains a region of 39 kb on chromosome 7  
376 whose polymorphism strongly co-segregated with the MDR phenotypes. Since the cross  
377 between both MDR strains indicated that the responsible mutations are allelic or closely  
378 linked, the identification of this common region from both independent BSA experiments is in  
379 favor of its involvement in the MDR phenotype.

380 In order to precisely map the *mdr* mutation on the 39 kb fragment of 09-CB1, we analyzed the  
381 alleles of the marker genes at each extremity of the region by HRM, as well as the *MFS1*  
382 promoter genotype by PCR in all progeny strains derived from the cross between 09-CB1 and  
383 IPO323. Table 3 shows that only the *MFS1* promoter genotype of the MDR parental strain  
384 strictly co-segregated with the MDR phenotype. A 100% co-segregation between the *MFS1*

385 promoter allele and the MDR phenotype was also observed for all 297 progeny strains derived  
 386 from cross 2 between 09-ASA-3apz and IPO94269.

387 **Table 3: Genotyping of progeny strains for *MFS1* alleles and linked marker genes.**

| marker\genotype | MDR-progeny (n=97) |        | sensitive progeny (n=111) |        |
|-----------------|--------------------|--------|---------------------------|--------|
|                 | 09-CB1             | IPO323 | 09-CB1                    | IPO323 |
| <i>NFX1</i>     | 96                 | 1      | 1                         | 110    |
| <i>PYC</i>      | 95                 | 2      | 1                         | 110    |
| <i>MFS1</i>     | 97                 | 0      | 0                         | 111    |

  

| marker\genotype | MDR-progeny (n=148) |          | sensitive progeny (n=149) |          |
|-----------------|---------------------|----------|---------------------------|----------|
|                 | 09-ASA-3apz         | IPO94269 | 09-ASA-3apz               | IPO94269 |
| <i>NFX1</i>     | n.a.                | n.a.     | n.a.                      | n.a.     |
| <i>PYC</i>      | n.a.                | n.a.     | n.a.                      | n.a.     |
| <i>MFS1</i>     | 148                 | 0        | 0                         | 149      |

388 Upper panel: cross 09-CB1 x IPO323; lower panel: cross 09-ASA-3apz x IPO94269; n.a. not analyzed  
 389

390 Expression analysis of *MFS1* in selected offspring showed *MFS1* overexpression in resistant  
 391 progeny strains (#145-R, #326-R, #250-R, #310-R) comparable to the MDR parental strains,  
 392 while the sensitive strain #97-S displayed the basal expression level characteristic of sensitive  
 393 strains (Fig. 3).

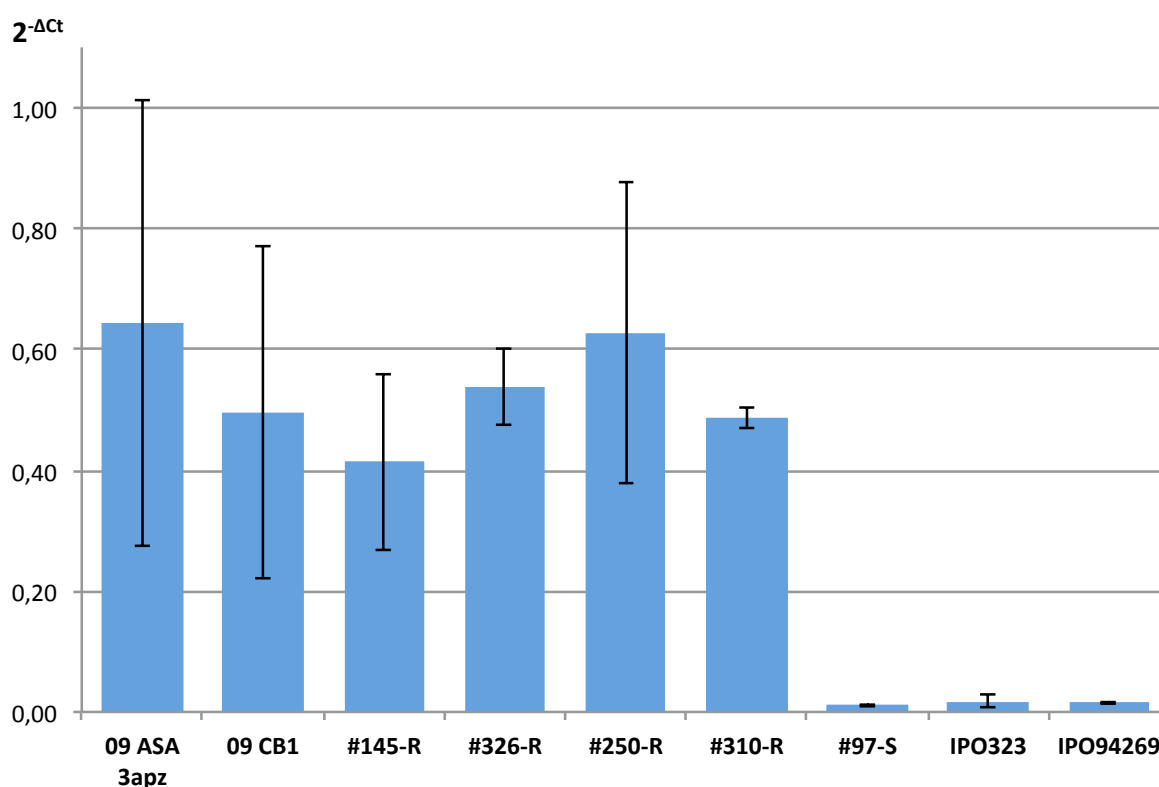

394 **Fig. 3: *MFS1* expression in parental and progeny strains.** Values are means of two biological  
 395 replicates, three or more in the case of the parental strains. Progeny strains with “R” suffix are of  
 396 MDR phenotype. Strain #97-S is of sensitive phenotype.

397

### 398 **Functional validation of the identified *mdr* mutation (*MFS1* insert)**

399 In order to validate the involvement of the 519 bp promoter insert in the MDR phenotype, we  
 400 proceeded through the replacement of the *MFS1*<sup>WT</sup> allele by the *MFS1*<sup>MDR</sup> allele in the  
 401 sensitive reference strain IPO323 (Fig. 4 A, B). After selection and isolation on hygromycine,  
 402 transformants were screened by PCR analysis with primers Z4\_110044\_FW and  
 403 Z4\_110044\_RV (Table S2) flanking the promoter insert (Fig. 4 A, B), to discriminate those  
 404 obtained by integration of the replacement construct at the *MFS1* locus from those with  
 405 ectopic integration, as latter showed more than one amplicon. Moreover, this PCR  
 406 distinguished between integration events of type a and type b, *i.e.*, type a integration lead to  
 407 the promoter insert, while type b integration did not (Fig. 4A).

A

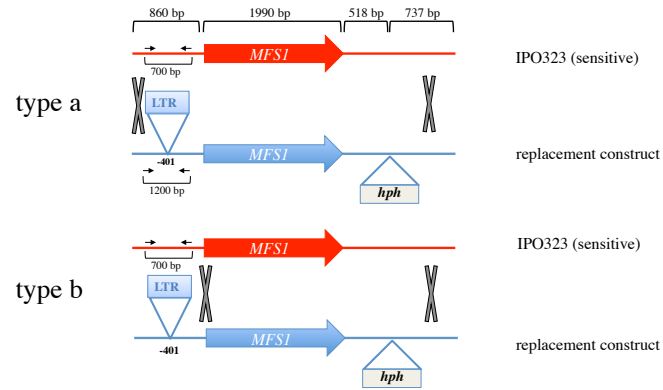

B

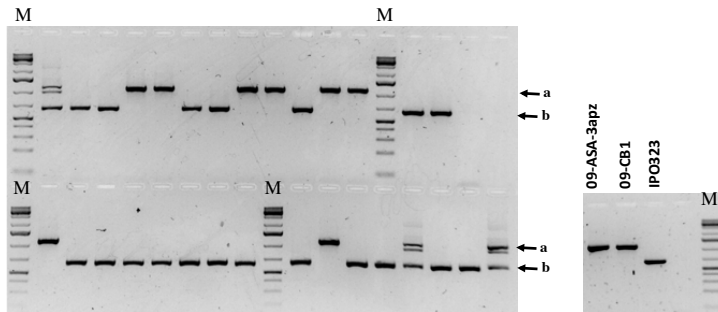

C

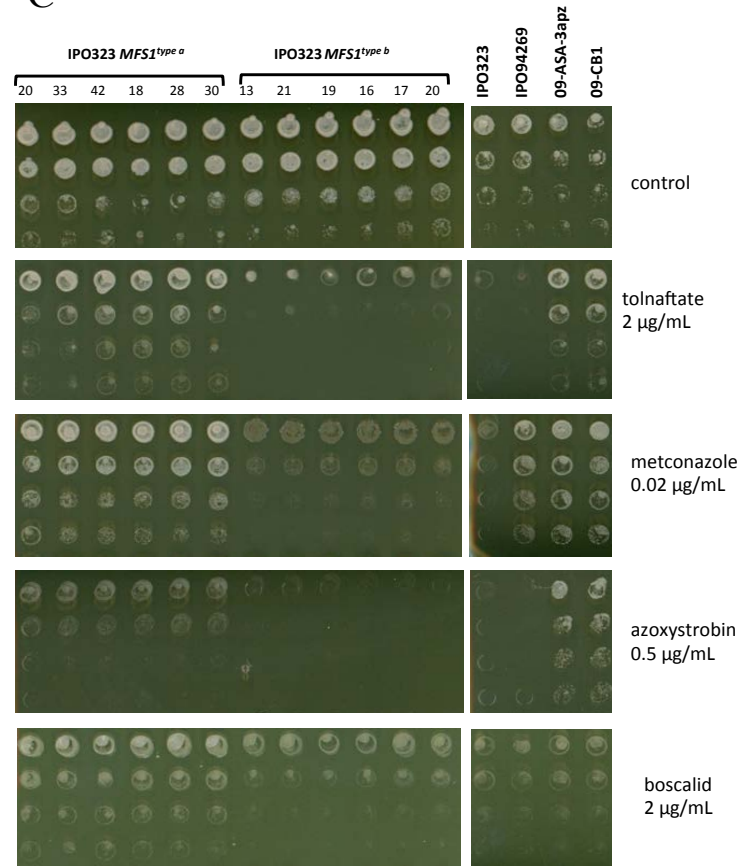

408 Fig 4: **Functional analysis of the *MFS1*<sup>MDR</sup> allele in the sensitive IPO323 strain.** A/ Principle of possible  
 409 homologous recombination events at the *MFS1* locus with the replacement construct. The gray Xs indicate  
 410 homologous recombination events leading to the integration of the hygromycine resistance marker *hph*. The  
 411 black arrows indicate the positions of the primers 2F and 4R used to distinguish between type a and type b  
 412 recombination events. B/ PCR analysis of isolated transformants with primers 2F and 4R. The black arrows  
 413 indicate the bands produced by type a or type b recombination. C/ Growth tests of selected transformants on  
 414 fungicides with different modes of action. Serial dilutions (top to down rows) of calibrated precultures of the  
 415 indicated strains were inoculated on growth test plates (YPD with the indicated fungicides) and incubated at  
 416 17°C during 5 days.

417 Six transformants of each category were tested for growth on different fungicides. As visible  
 418 from Fig. 4 C only the integration of the 519 bp insert in the *MFS1* promoter (type a  
 419 integration) conferred increased tolerance to the squalene epoxidase inhibitor tolnaftate, to the  
 420 DMI metconazole, to the QoI azoxystrobin and to the SDHI boscalid. Similar results were  
 421 observed with terbinafine, prochloraz and bixafen (data not shown). Type b integrants  
 422 displayed the same sensitivity to the compounds as the parental IPO323 strain. Four selected  
 423 transformants with the promoter insert (transformants 20, 33, 18, 28) overexpressed *MFS1*  
 424 compared to IPO323 while type b transformants 13, 19, 16, 17 (without the insert) did not  
 425 (Fig. 5).

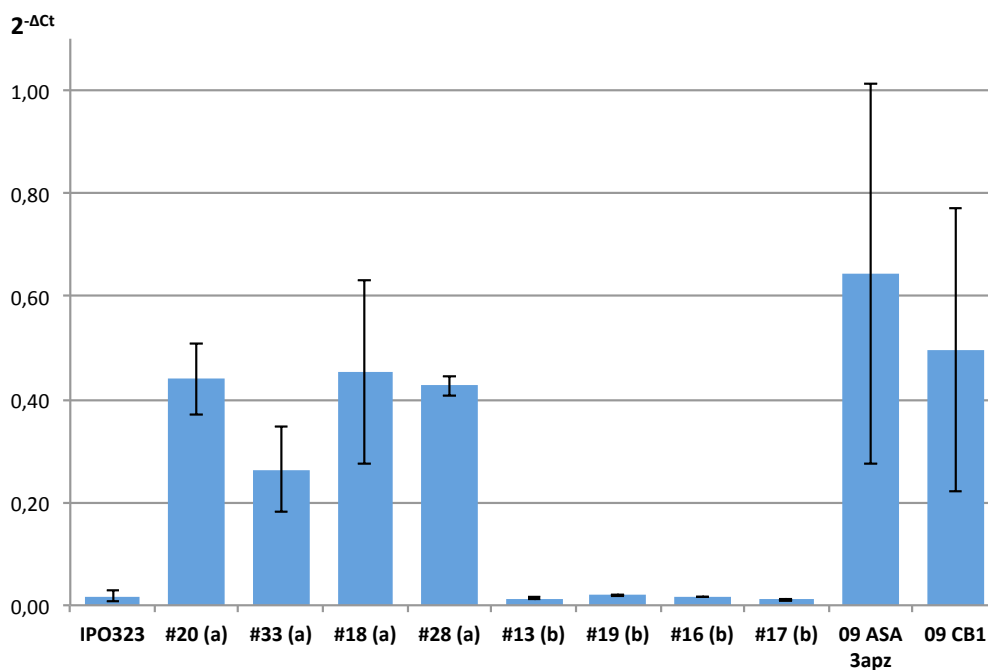



426 Fig. 5: ***MFS1* expression in IPO323 *MFS1* replacement mutants.** *MFS1* expression was measured by qRT-  
427 PCR relative to three reference genes (*β-tubulin*, *eF1a*, *actine*). Values are means of two to three biological  
428 replicates, three or more in the case of the field strains. Transformants are indicated by the hashtag symbol (#).  
429 The letters in the brackets refer to the recombination event of Fig. 4. Type a recombination leads to the promoter  
430 insert of 519 bp and the MDR phenotype, while type b recombination event does not.

431

432 We may thus conclude that the 519 bp LTR insert in the *MFS1* promoter leads to its  
433 overexpression and consequently to an MDR phenotype.

## 434 **II. *MFS1* promoter and expression analysis in *Z. tritici* field isolates**

435 In a population survey we tested if the *MFS1* promoter insert was present in all field isolates  
436 phenotyped as MDR, applying PCR with the primer pair MFS1\_2F / MFS1\_4R (Table S2).  
437 No insert was detected in non-MDR strains. In 35 genotyped MDR strains however, we  
438 obtained three different amplicons of 1000, 850 or 650 bp respectively, corresponding to three  
439 different inserts, designated type I, II or type III inserts. The 519 bp LTR insert (type I) was  
440 the most frequent insert, detected since 2009; type II insert was detected in 25% of the strains  
441 and present since 2012; type III insert was detected in only two strains from 2015 (Garnault et  
442 al., unpublished).

443 We determined the EC50 values on selected DMIs, terbinafine and tolnaftate for field strains  
444 representative each type of insert (n=7/type I; n=5/type II; n=2/type III). Resistance factors of  
445 the three genotypes to tolnaftate and terbinafine (unlinked to any specific resistance and not  
446 affected by the *CYP51* alleles), listed in Table 4, reveal similar phenotypes for strains with  
447 type I and II inserts, while the resistance factor conferred to by the type III insert seems  
448 weaker.

449

450 **Table 4: Resistance factors (RF<sup>a</sup>) of *Z. tritici* field isolates with different *CYP51* and *MFS1* alleles**  
 451 **relative to *CYP51*<sup>WT</sup> *MFS1*<sup>WT</sup>**

| genotype <sup>b</sup>                                              |                                | tolnaftate | terbinafine  | epoxiconazole | prothioconazole-desthio | tebuconazole | metconazole   | pyrifenoX     |
|--------------------------------------------------------------------|--------------------------------|------------|--------------|---------------|-------------------------|--------------|---------------|---------------|
| <i>CYP51</i> <sup>WT</sup><br><i>MFS1</i> <sup>WT</sup>            | EC50<br>(ng mL <sup>-1</sup> ) | 15 +/- 3.5 | 0.1 +/- 0.02 | 0.35 +/- 0.17 | 0.32 +/- 0.18           | 3.4 +/- 0.9  | 0.21 +/- 0.04 | 0.38 +/- 0.14 |
| <i>CYP51</i> <sup>TriR</sup><br><i>MFS1</i> <sup>WT</sup>          | RF                             | n.d.       | n.d.         | 258           | 51.9                    | 609          | 360           | 559           |
| <i>CYP51</i> <sup>TriR</sup><br><i>MFS1</i> <sup>MDR-typeIII</sup> | RF                             | 3.8        | 37.5         | 927           | 144                     | 269          | 1116          | 709           |
| <i>CYP51</i> <sup>TriR</sup><br><i>MFS1</i> <sup>MDR-typeII</sup>  | RF                             | 11.5       | 87.6         | 1138          | 107                     | 381          | 572           | 1054          |
| <i>CYP51</i> <sup>TriR</sup><br><i>MFS1</i> <sup>MDR-typeI</sup>   | RF                             | 11.9       | 84.3         | 959           | 73.6                    | 546          | 655           | 610           |

452 <sup>a</sup> The RFs are expressed as EC50 (studied genotype) / EC50 (*CYP51*<sup>WT</sup> *MFS1*<sup>WT</sup>)

453 <sup>b</sup> The *CYP51*<sup>TriR</sup> genotype groups together different *CYP51* genotypes of field-strains with  
 454 cross-resistance to DMIs

455

456 The *MFS1* transporter gene was found overexpressed also in the field strains with inserts of  
 457 type II and type III (Fig. 6), although eventually at lower levels as compared to strains with  
 458 insert of type I.

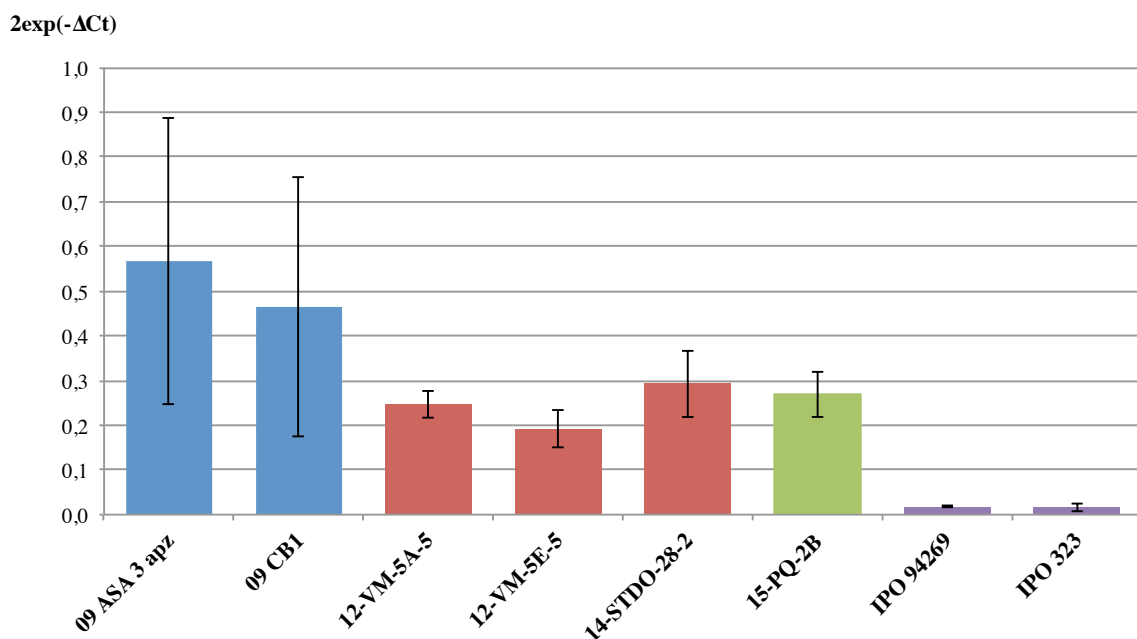

459 **Fig. 6: *MFS1* expression in *Z. tritici* field isolates with different promoter genotypes.** *MFS1* expression in  
460 selected field strains harboring type I-III inserts (blue = type I; red = type II, green = type III, violet = no insert).  
461 *MFS1* expression was measured by qRT-PCR relative to three reference genes (*β-tubulin*, *eF1a*, *actin*) in three  
462 technical replicates.

463

#### 464 **Sequence of the *MFS1* promoter in *Z. tritici* MDR field isolates**

465 We have sequenced the region 500 bp upstream of the *MFS1* start codon in 26 MDR field  
466 isolates (Genbank accessions MF623010-MF623033; Fig. S1). This region covers the three  
467 types of inserts that localize in a region between 200 and 500 bp upstream of the start codon  
468 (Fig. 7D). The integration sites all displayed short repeated sequences (5 - 10 bp). Type II  
469 insert was found in two lengths, 369 bp (type IIa) and in a 30 bp shorter version (type IIb), but  
470 otherwise 87% identical. Type III inserts were identical between both strains, 149 bp in length.

471 As mentioned earlier, the type I insert corresponds to the 519 bp LTR sequence of a  
472 Ty1/Copia retrotransposon localized on chromosome 18 (Omrane *et al.*, 2015) in the  
473 sequenced strain IPO323 and annotated as still active (Dhillon *et al.*, 2014, Goodwin *et al.*,  
474 2011).

475 We also screened the sequence of the type II insert against available *Z. tritici* sequences by  
476 blastn-searches (Altschul *et al.*, 1997). The query sequence got multiple hits against the IPO  
477 323 sequence (51 hits with >95% identity over >200 bp), had three matches on the genome  
478 sequence of JGIBBWB-9N22 and was found 99% identical to the insert found upstream of  
479 *CYP51* in some *Z. tritici* DMI resistant isolates, in particular in strain 09-ASA-3apz (Omrane  
480 *et al.*, 2015). These results indicate that the type II insert may be a repeated element of the *Z.*  
481 *tritici* genome or part of it.

482 Searching the sequence of type III insert against the IPO323 genome sequence also gave five  
483 hits with >86% identity over more than 110 bp with not annotated nucleotide sequences.

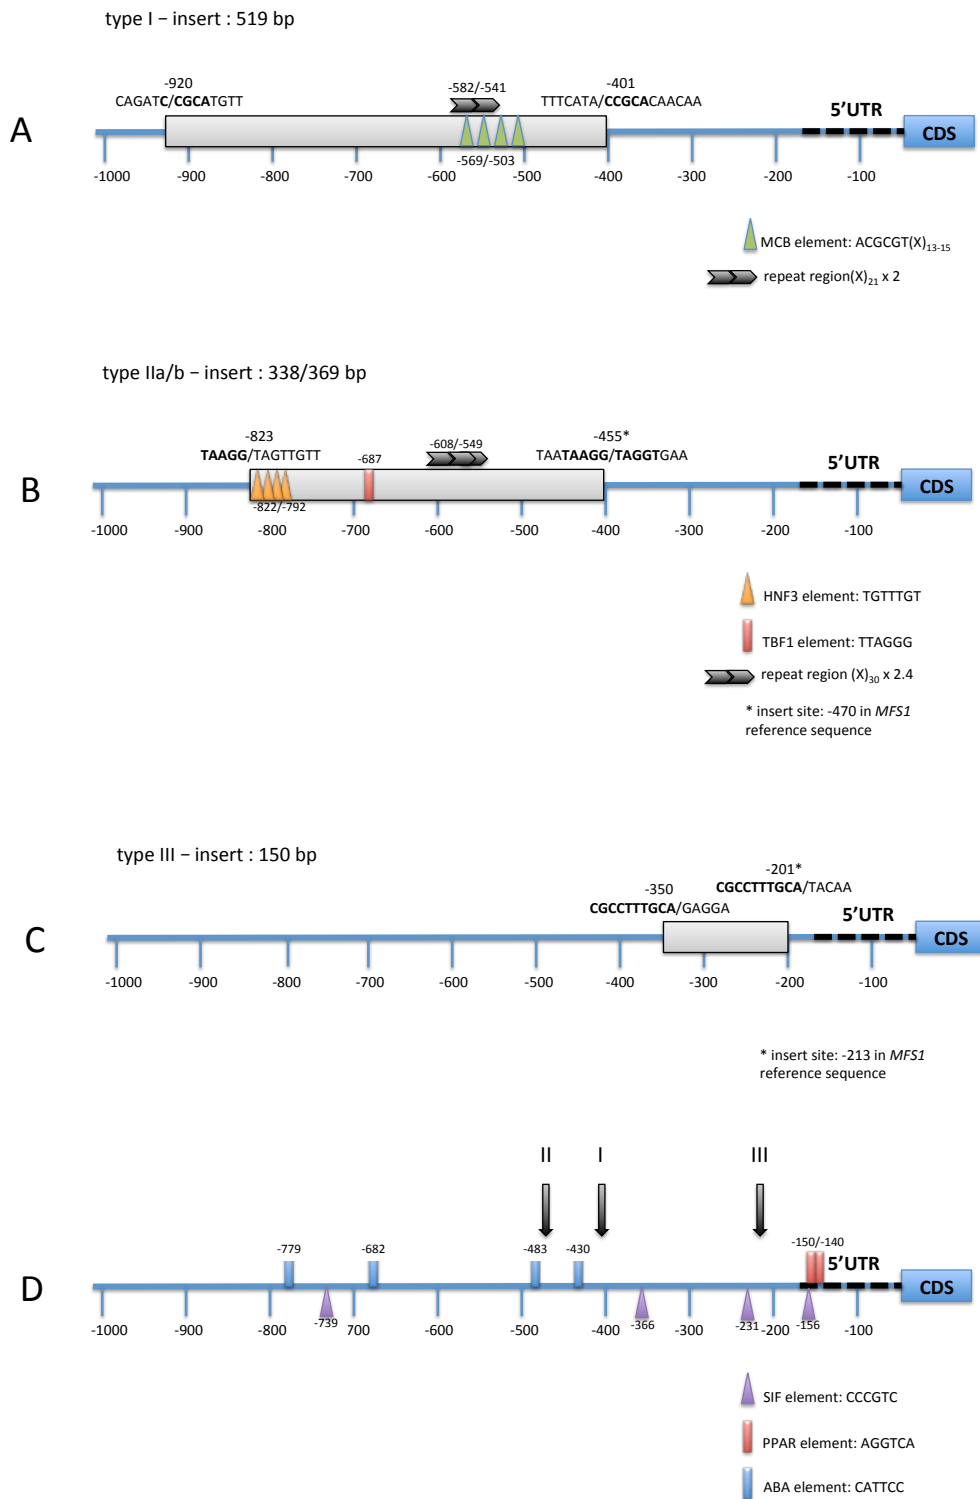

484 Fig. 7: **Molecular structure of *MFS1* promoter genotypes.** The figures indicate the location, length and insert  
 485 sites of *MFS1* promoter inserts. Repeats between both insertion sites are indicated by bold letters. Consensus  
 486 sequences of potential regulatory elements identified by TRANSFAC searches (Fogel *et al.*, 2005), are indicated  
 487 by the colored triangles and boxes. Repeats of longer sequences, found using mreps (Kolpakov *et al.*, 2003), are  
 488 indicated by the black arrows. For details see text.

489

## 490 **Identification of putative regulatory elements in the *MFS1* promoter**

491 Since type I insert drives constitutive overexpression of the *MFS1* gene, we suspected this  
492 element to contain upstream activating sequences (UAS). UAS may act to recruit  
493 transcription activators or co-activators increasing the affinity of the general transcription  
494 machinery or through opening the chromatin structure (reviewed in Hahn & Young, 2011)  
495 leading to higher transcription levels. Within the 519 bp insert sequence, we searched for  
496 known transcription factor binding sites of the TRANSFAC database (Fogel *et al.*, 2005) as  
497 well as for larger tandem repeats or palindromic repeats using mreps (Kolpakov *et al.*, 2003).  
498 As highlighted in Fig. 7A, we identified four successive consensus sequences of the MCB  
499 element (ACGCGT), separated by 13-15 bp respectively in a region 569 to 503 bp upstream  
500 of the start codon. This region also overlaps a tandem repeat of 21 bp (-582 to -541). The  
501 MCB element (*MluI* cell cycle box, also termed MBP element) is a hexamer sequence  
502 regulating the expression of genes involved in G1-phase transition, firstly identified in *S.*  
503 *cerevisiae* (Dirick *et al.*, 1992). The number of MCB repeats correlates with the expression  
504 level (Verma *et al.*, 1992). As MCB elements are well conserved in the promoters of G1-  
505 phase genes among fungal species (Gasch *et al.*, 2004), one may suspect that the four  
506 elements present in the type I insert drive *MFS1* expression in strains harboring this insert.

507 The same strategy was applied to identify putative UAS in type II and type III inserts. A  
508 search against all available consensus site sequences of the TRANSFAC databases lead to  
509 multiple hits of more or less randomly distributed sequences (not shown). We therefore  
510 limited our search to hexamers and longer sequences, especially those present as direct or  
511 inversed repeats. While in the shortest insert (type III) no repeated sequence above this  
512 threshold was identified, type II insert harbors different potential regulatory elements as  
513 highlighted in Fig. 7B. In a region comprised between -822 and -792 we found four direct  
514 repeats of the HNF3 (*Rattus norvegicus*) motif (Cirillo *et al.*, 2002, Johnson *et al.*, 1995). The

515 hexamer TTAGGG corresponding to the *S. cerevisiae* TBF1 element (Brigati *et al.*, 1993)  
516 was present at position -687. In addition a 30 bp sequence was repeated 2.4 times in a region  
517 between -608 and -549, suggesting that also the type II insert may activate the transcription of  
518 the downstream *MFS1* gene.

519 The original *MFS1* promoter of the sensitive IPO323 strain was analyzed for potential  
520 regulatory sequences as described above. Among repeated highly conserved consensus  
521 sequences, we identified four repeats of the *Aspergillus nidulans* AbaA binding site CATTCC  
522 (Andrianopoulos & Timberlake, 1994), 779 to 430 bp upstream of the start codon, four  
523 repeated SIF elements (Bhat *et al.*, 1994, Wagner *et al.*, 1990)(positions -739, -366, -231, -  
524 156) and two adjacent PPAR (or PPRE) elements (Blanquart *et al.*, 2003) in the 5'UTR. Some  
525 of these elements may be involved in the regulation of *MFS1* transcription under fungicide  
526 treatment (Omrane *et al.*, 2015) or under yet unknown conditions.

527

## 528 **Discussion**

529 Increased drug tolerance through increased efflux is a general phenomenon threatening major  
530 clinical treatments, anti-cancer, antibacterial and antifungal drugs, respectively (Avner *et al.*,  
531 2012, Wong, 2017, Wu *et al.*, 2014, Paul & Moye-Rowley, 2014). In agriculture, the same  
532 phenomenon resulting in MDR has been documented in the last decades with the  
533 identification of the involved membrane transporters (Chapeland *et al.*, 1999, Kretschmer *et*  
534 *al.*, 2009, Sang *et al.*, 2015, Leroux *et al.*, 2013, Leroux & Walker, 2013, Omrane *et al.*,  
535 2015). While drug efflux *per se* does not confer high resistance levels, the combination with  
536 specific resistance mutations, can strongly impair the efficacy of agro-chemical fungicides.  
537 This phenomenon is already being observed in *B. cinerea* (Kretschmer *et al.*, 2009, Leroch *et*  
538 *al.*, 2013, Leroux & Walker, 2013), *S. homeocarpa* (Hulvey *et al.*, 2012, Sang *et al.*, 2015)  
539 with several modes of action and, in the case of *Z. tritici*, with DMIs (Leroux & Walker,  
540 2011). The introduction of new modes of action will help dealing with the diseases despite  
541 complicated resistance situations, but intelligent treatment strategies must be applied to delay  
542 and limit the risk of development and recombination with already fixed resistances.

543 The mutations responsible for clinical antifungal MDR identified so far, are principally gain-  
544 of-function mutations in the transcription factors CaTac1, CaMrr1 (*C. albicans*) and CgPdr1  
545 (*C. glabrata*) regulating the expression of ABC or MFS transporter genes (reviewed in  
546 Morschhäuser, 2010, Paul & Moye-Rowley, 2014). In the plant pathogenic fungus *Botrytis*  
547 *cinerea*, similar gain of function mutations in the transcription factor BcMrr1 have been  
548 identified in MDR field strains, responsible for the overexpression of the ABC-transporter  
549 encoding gene *BcatrB* (Kretschmer *et al.*, 2009, Leroch *et al.*, 2013). In addition, the mutation  
550 leading to the overexpression of the MFS transporter encoding gene *BcmfsM2* was identified  
551 as a promoter deletion-insertion event; the insert being a retro-element like gene fragment  
552 (Kretschmer *et al.*, 2009).

553 In our previous study, we identified *MFS1* as a major player in *Z. tritici* multidrug resistance  
554 (Omrane *et al.*, 2015) and had found a retro-transposon relic as an insert in the *MFS1*  
555 promoter. In this study we used an unbiased approach by classical and high throughput  
556 genetics to identify the MDR-responsible mutations.

557 We discovered that the *mdr* mutations of both analyzed strains are identical, although their  
558 MDR phenotypes differ slightly (Leroux & Walker, 2011), and their drug efflux is affected  
559 differently by chemical modulators (Omrane *et al.*, 2015). Therefore one may suspect  
560 additional mutations explaining such differences. The observed segregation between sensitive  
561 *vs.* MDR strains among the progeny was close to the ratio of 1:1, but the selection of  
562 offspring was not completely random. A potential bias can have its origin in the analyzed  
563 progeny, as we eliminated 25% of the offspring as mixtures/impure strains. In addition, the  
564 phenotypic screen for the MDR phenotype may have been too stringent to identify slight,  
565 quantitative differences in resistance to tolnaftate that could have originated from multiple  
566 quantitative mutations.

567 The present study identified three different types of inserts in the *MFS1* promoter region  
568 potentially involved in *MFS1* overexpression and, consequently, in MDR. The most frequent  
569 insert, type I, is the previously identified relic of a still active Ty1/Copia retrotransposon  
570 (Dhillon *et al.*, 2014); the type II insert also resembles a repetitive element, as it was detected  
571 at >100 instances in the *Z. tritici* genome sequence. Also the type III insert was found  
572 repeated, but less frequently. We have shown that the LTR insert (type I) is responsible for  
573 *MFS1* overexpression through classical and reverse genetics. Using a similar gene  
574 replacement strategy, we could also confirm the role of inserts II and III in MDR (data not  
575 shown).



576 We addressed the question if the inserts drive *MFS1* expression on their own or if they disrupt  
577 transcription repression, through *in silico* analysis of the generated promoter sequences. In the  
578 case of the LTR insert, it is highly probable that the insert drives *MFS1* expression on its own,  
579 as LTR elements harbor *cis*-regulatory sequences (reviewed by (Chuong *et al.*, 2017,  
580 Muszewska *et al.*, 2011)). The *MFS1*-type I LTR element harbors four potential MCB  
581 elements known as sequence regulating expression of G1-phase genes in *S. cerevisiae* (Dirick  
582 *et al.*, 1992, Moll *et al.*, 1992). As the sequence of this element was found highly conserved  
583 upstream of G1-phase genes in fungi (Gasch *et al.*, 2004), these elements probably drive the  
584 strong constitutive expression of *MFS1* in type I-MDR strains. Moreover, the regulation of  
585 transcription according to cell cycle progression by MCB elements may explain the strong  
586 variation observed in the *MFS1* expression levels in type I-MDR strains. Potential UASs were  
587 also detected in the type II insert eventually driving *MFS1* constitutive overexpression, while  
588 the type III insert seems devoid of novel regulatory elements. In sensitive *Z. tritici* strains,  
589 *MFS1* expression is induced after fungicide challenge (Omrane *et al.*, 2015), while all insert  
590 leads to high basal expression. These results suggest that the LTR insert drives expression on  
591 its own while abolishing the induction under fungicide challenge (Omrane *et al.*, 2015). The  
592 function of type II insert might be similar (induction instead of release of repression), while in  
593 the case of type III insert, its position close to the 5' UTR and the absence of known UASs,  
594 we may suspect that this element rather releases the inhibition of *MFS1* transcription. To fully  
595 understand the regulation of *MFS1* expression, to discriminate between both hypotheses and  
596 the role of the potential regulatory elements in *MFS1* transcription regulation remains to be  
597 established through promoter fusion experiments. In addition the transcription regulators  
598 involved in *MFS1* regulation in response to drug challenging remain to be identified in *Z.*  
599 *tritici*.

600 Finally, our analysis of *Z. tritici* field strains revealed three to four different insertion events  
601 into the *MFS1* promoter with strong impact on the fungicide sensitivity phenotype. Mobile  
602 elements mediating fungicide resistance through target gene overexpression is a common  
603 mechanism among phytopathogenic fungi. Especially in the *CYP51* promoters of various  
604 fungal species repeated elements or reminiscence of them were found, *e.g.*, *Penicillium*  
605 *digitatum* (Ghosoph *et al.*, 2007, Sun *et al.*, 2013), *Blumeria jaapii* (Ma *et al.*, 2006),  
606 *Monilinia fructicola* (Luo & Schnabel, 2008), *Venturia inequalis* (Schnabel & Jones, 2001,  
607 Villani *et al.*, 2016), and *Z. tritici* (Cools *et al.*, 2012). Transposable elements (TEs) are  
608 known to modify genome structure, gene functions and phenotypes (Castanera *et al.*, 2016,  
609 Chuong *et al.*, 2017, Hirsch & Springer, 2016, Amselem *et al.*, 2015). In filamentous fungi,  
610 the genome content in TEs can be highly variable even between closely related species  
611 (Muszewska *et al.*, 2011, Grandaubert *et al.*, 2014). TEs are suspected to contribute to host  
612 adaptation, *e.g.*, in *Magnaporthe oryzae* (Yoshida *et al.*, 2016), to speciation and to higher  
613 adaptive capacity to selective pressure (including pathogenicity evolution) by generating  
614 genomic rearrangements (Grandaubert *et al.*, 2014, Hartmann & Croll, 2017). It was recently  
615 established that >17% of the *Z. tritici* genome sequence was repetitive, out of which 70%  
616 corresponding to retro-transposable elements (Dhillon *et al.*, 2014, Grandaubert *et al.*, 2015).

617 Among the LTR-transposons identified by Dhillon *et al.* (Dhillon *et al.*, 2014), one (family  
618 18) showed minimal evidence of RIP and was therefore supposed to be still active. Indeed,  
619 the LTR-sequence corresponding to the *MFS1*-type I insert, is 100% identical to this family  
620 18 LTR. We may therefore suspect that this LTR insertion is due to a recent retro-  
621 transposition event. According to their data, Grandaubert and co-workers supposed that also  
622 class II DNA transposons are still active in *Z. tritici* (Grandaubert *et al.*, 2015). They might be  
623 at the origin of the other two insertion events.

624 Little is known about the influence of fungicide exposure on (retro-) transposon mobilization.  
625 Chen and colleagues observed increased mobilization of the transposable element *Mfrc1* in *M.*  
626 *fructicola* after *in vitro* exposure to sub-lethal fungicide concentrations, although not affecting  
627 fungicide sensitivity (Chen *et al.*, 2015).

628 The question remains if the *MFS1* promoter is prone to insertion events relatively more  
629 frequently than other genomic *loci* or if this is only due to fungicide selection pressure. The  
630 available and forthcoming *Z. tritici* whole genome sequences and associated transcriptomic  
631 data will shade light on the influence of transposable elements on genome structure and global  
632 gene expression (Grandaubert *et al.*, 2015, Zhong *et al.*, 2017, Hartmann *et al.*, 2017), but  
633 also on their evolution. Population genomics and experimental evolution may also help  
634 evaluating the impact of fungicide pressure on transposon mobilization.

635

636 **Acknowledgements**

637 The authors are grateful to Arvalis, Institut du Végétal, to BASF, Bayer, DuPont de Nemours  
638 and to Syngenta for financial support. Part of the study was financed by Ministère de  
639 l'environnement, du développement durable et de l'écologie (MEDDE) through the Ecophyto  
640 II program.

641 **References**

642

643

644 Altschul, S.F., T.L. Madden, A.A. Schaffer, J. Zhang, Z. Zhang, W. Miller & D.J. Lipman,  
645 (1997) Gapped BLAST and PSI-BLAST: a new generation of protein database search  
646 programs. *Nucleic Acids Res* **25**: 3389-3402.

647 Amselem, J., M.H. Lebrun & H. Quesneville, (2015) Whole genome comparative analysis of  
648 transposable elements provides new insight into mechanisms of their inactivation in fungal  
649 genomes. *BMC Genomics* **16**: 141.

650 Andrianopoulos, A. & W.E. Timberlake, (1994) The *Aspergillus nidulans* *abaA* gene encodes  
651 a transcriptional activator that acts as a genetic switch to control development. *Mol Cell Biol*  
652 **14**: 2503-2515.

653 Avner, B.S., A.M. Fialho & A.M. Chakrabarty, (2012) Overcoming drug resistance in multi-  
654 drug resistant cancers and microorganisms: a conceptual framework. *Bioengineered* **3**: 262-  
655 270.

656 Barrett-Bee, K.J., A.C. Lane & R.W. Turner, (1986) The mode of antifungal action of  
657 tolnaftate. *Journal of medical and veterinary mycology : bi-monthly publication of the*  
658 *International Society for Human and Animal Mycology* **24**: 155-160.

659 Bhat, G.J., T.J. Thekkumkara, W.G. Thomas, K.M. Conrad & K.M. Baker, (1994)  
660 Angiotensin II stimulates sis-inducing factor-like DNA binding activity. Evidence that the  
661 AT1A receptor activates transcription factor-Stat91 and/or a related protein. *J Biol Chem* **269**:  
662 31443-31449.

663 Blanquart, C., O. Barbier, J.C. Fruchart, B. Staels & C. Glineur, (2003) Peroxisome  
664 proliferator-activated receptors: regulation of transcriptional activities and roles in  
665 inflammation. *The Journal of steroid biochemistry and molecular biology* **85**: 267-273.

666 Brigati, C., S. Kurtz, D. Balderes, G. Vidali & D. Shore, (1993) An essential yeast gene  
667 encoding a TTAGGG repeat-binding protein. *Mol Cell Biol* **13**: 1306-1314.

668 Brown, J.K.M., L. Chartrain, P. Lasserre-Zuber & C. Saintenac, (2015) Genetics of resistance  
669 to *Zymoseptoria tritici* and applications to wheat breeding. *Fungal Genetics and Biology* **79**:  
670 33-41.

671 Cannon, R.D., E. Lamping, A.R. Holmes, K. Niimi, P.V. Baret, M.V. Keniya, K. Tanabe, M.  
672 Niimi, A. Goffeau & B.C. Monk, (2009) Efflux-Mediated Antifungal Drug Resistance.  
673 *Clinical Microbiology Reviews* **22**: 291-321.

674 Castanera, R., L. López-Varas, A. Borgognone, K. LaButti, A. Lapidus, J. Schmutz, J.  
675 Grimwood, G. Pérez, A.G. Pisabarro, I.V. Grigoriev, J.E. Stajich & L. Ramírez, (2016)  
676 Transposable Elements *versus* the Fungal Genome: Impact on Whole-Genome Architecture  
677 and Transcriptional Profiles. *PLoS Genet* **12**: e1006108.

678 Chapeland, F., R. Fritz, C. Lanen, M. Gredt & P. Leroux, (1999) Inheritance and Mechanisms  
679 of Resistance to Anilinopyrimidine Fungicides in *Bortyitis cinerea* (*Botryotinia fuckeliana*).  
680 *Pestic. Biochem. Physiol.* **64**: 85-100.

681 Chen, F., S.E. Everhart, P.K. Bryson, C. Luo, X. Song, X. Liu & G. Schnabel, (2015)  
682 Fungicide-induced transposon movement in *Monilinia fructicola*. *Fungal Genetics and*  
683 *Biology* **85**: 38-44.

684 Chuong, E.B., N.C. Elde & C. Feschotte, (2017) Regulatory activities of transposable  
685 elements: from conflicts to benefits. *Nature reviews. Genetics* **18**: 71-86.

686 Cirillo, L.A., F.R. Lin, I. Cuesta, D. Friedman, M. Jarnik & K.S. Zaret, (2002) Opening of  
687 compacted chromatin by early developmental transcription factors HNF3 (FoxA) and GATA-  
688 4. *Mol Cell* **9**: 279-289.

689 Cools, H.J., C. Bayon, S. Atkins, J.A. Lucas & B.A. Fraaije, (2012) Overexpression of the  
690 sterol 14 $\alpha$ -demethylase gene (MgCYP51) in *Mycosphaerella graminicola* isolates confers a  
691 novel azole fungicide sensitivity phenotype. *Pest Manag Sci* **68**: 1034-1040.

692 Cools, H.J. & B.A. Fraaije, (2013) Update on mechanisms of azole resistance in  
693 *Mycosphaerella graminicola* and implications for future control. *Pest Manag Sci* **69**: 150-155.

694 Darling, A.C., B. Mau, F.R. Blattner & N.T. Perna, (2004) Mauve: multiple alignment of  
695 conserved genomic sequence with rearrangements. *Genome Res* **14**: 1394-1403.

696 Dhillon, B., N. Gill, R.C. Hamelin & S.B. Goodwin, (2014) The landscape of transposable  
697 elements in the finished genome of the fungal wheat pathogen *Mycosphaerella graminicola*.  
698 *BMC Genomics* **15**: 1132.

699 Dirick, L., T. Moll, H. Auer & K. Nasmyth, (1992) A central role for SWI6 in modulating cell  
700 cycle Start-specific transcription in yeast. *Nature* **357**: 508-513.

701 Duitama, J., A. Sánchez-Rodríguez, A. Goovaerts, S. Pulido-Tamayo, G. Hubmann, M.R.  
702 Foulquié-Moreno, J.M. Thevelein, K.J. Verstrepen & K. Marchal, (2014) Improved linkage  
703 analysis of Quantitative Trait Loci using bulk segregants unveils a novel determinant of high  
704 ethanol tolerance in yeast. *BMC genomics* **15**: 207.

705 Duveau, F., B.P.H. Metzger, J.D. Gruber, K. Mack, N. Sood, T.E. Brooks & P.J. Wittkopp,  
706 (2014) Mapping small effect mutations in *Saccharomyces cerevisiae*: impacts of experimental  
707 design and mutational properties. *G3 (Bethesda, Md.)* **4**: 1205-1216.

708 Fogel, G.B., D.G. Weekes, G. Varga, E.R. Dow, A.M. Craven, H.B. Harlow, E.W. Su, J.E.  
709 Onyia & C. Su, (2005) A statistical analysis of the TRANSFAC database. *Bio Systems* **81**:  
710 137-154.

711 Fones, H. & S. Gurr, (2015) The impact of *Septoria tritici* Blotch disease on wheat: An EU  
712 perspective. *Fungal Genet Biol* **79**: 3-7.

713 Fraaije, B.A., C. Bayon, S. Atkins, H.J. Cools, J.A. Lucas & M.W. Fraaije, (2011) Risk  
714 assessment studies on succinate dehydrogenase inhibitors, the new weapons in the battle to  
715 control Septoria leaf blotch in wheat. *Mol Plant Pathol*: no-no.

716 Gasch, A.P., A.M. Moses, D.Y. Chiang, H.B. Fraser, M. Berardini & M.B. Eisen, (2004)  
717 Conservation and evolution of cis-regulatory systems in ascomycete fungi. *PLoS biology* **2**:  
718 e398.

719 Gautier, A., T. Marcel, J. Confais, C. Crane, G. Kema, F. Suffert & A.-S. Walker, (2014)  
720 Development of a rapid multiplex SSR genotyping method to study populations of the fungal  
721 plant pathogen *Zymoseptoria tritici*. *BMC research notes* **7**: 373.

722 Georgopapadakou, N.H. & A. Bertasso, (1992) Effects of squalene epoxidase inhibitors on  
723 *Candida albicans*. *Antimicrobial Agents and Chemotherapy* **36**: 1779-1781.

724 Ghosop, J.M., L.S. Schmidt, D.A. Margosan & J.L. Smilanick, (2007) Imazalil resistance  
725 linked to a unique insertion sequence in the PdCYP51 promoter region of *Penicillium*  
726 *digitatum*. *Postharvest Biology and Technology* **44**: 9-18.

727 Goodwin, S.B., B. M'Barek S, B. Dhillon, A.H. Wittenberg, C.F. Crane, J.K. Hane, A.J.  
728 Foster, T.A. Van der Lee, J. Grimwood, A. Aerts, J. Antoniw, A. Bailey, B. Bluhm, J. Bowler,  
729 J. Bristow, A. van der Burgt, B. Canto-Canche, A.C. Churchill, L. Conde-Ferraez, H.J. Cools,  
730 P.M. Coutinho, M. Csukai, P. Dehal, P. De Wit, B. Donzelli, H.C. van de Geest, R.C. van  
731 Ham, K.E. Hammond-Kosack, B. Henrissat, A. Kilian, A.K. Kobayashi, E. Koopmann, Y.  
732 Kourmpetis, A. Kuzniar, E. Lindquist, V. Lombard, C. Maliepaard, N. Martins, R. Mehrabi,  
733 J.P. Nap, A. Ponomarenko, J.J. Rudd, A. Salamov, J. Schmutz, H.J. Schouten, H. Shapiro, I.  
734 Stergiopoulos, S.F. Torriani, H. Tu, R.P. de Vries, C. Waalwijk, S.B. Ware, A. Wiebenga,  
735 L.H. Zwiars, R.P. Oliver, I.V. Grigoriev & G.H. Kema, (2011) Finished genome of the fungal  
736 wheat pathogen *Mycosphaerella graminicola* reveals dispensome structure, chromosome  
737 plasticity, and stealth pathogenesis. *PLoS Genet* **7**: e1002070.

738 Grandaubert, J., A. Bhattacharyya & E.H. Stukenbrock, (2015) RNA-seq-Based Gene  
739 Annotation and Comparative Genomics of Four Fungal Grass Pathogens in the Genus  
740 *Zymoseptoria* Identify Novel Orphan Genes and Species-Specific Invasions of Transposable  
741 Elements. *G3: Genes/Genomes/Genetics* **5**: 1323-1333.

742 Grandaubert, J., R.G. Lowe, J.L. Soyer, C.L. Schoch, A.P. Van de Wouw, I. Fudal, B.  
743 Robbertse, N. Lapalu, M.G. Links, B. Ollivier, J. Linglin, V. Barbe, S. Mangenot, C. Cruaud,  
744 H. Borhan, B.J. Howlett, M.H. Balesdent & T. Rouxel, (2014) Transposable element-assisted  
745 evolution and adaptation to host plant within the *Leptosphaeria maculans*-*Leptosphaeria*  
746 *biglobosa* species complex of fungal pathogens. *BMC Genomics* **15**: 891.

747 Green, M.R. & J. Sambrook, (2012) *Molecular cloning: A laboratory manual*. Cold Spring  
748 Harbor Laboratory Press, Cold Spring Harbor, NY, USA.

749 Gulshan, K. & W.S. Moye-Rowley, (2007) Multidrug resistance in fungi. *Eukaryot Cell* **6**:  
750 1933-1942.

751 Hahn, S. & E.T. Young, (2011) Transcriptional Regulation in *Saccharomyces cerevisiae*:  
752 Transcription Factor Regulation and Function, Mechanisms of Initiation, and Roles of  
753 Activators and Coactivators. *Genetics* **189**: 705-736.

- 754 Hartmann, F.E. & D. Croll, (2017) Distinct Trajectories of Massive Recent Gene Gains and  
755 Losses in Populations of a Microbial Eukaryotic Pathogen. *Molecular Biology and Evolution*.
- 756 Hartmann, F.E., A. Sanchez-Vallet, B.A. McDonald & D. Croll, (2017) A fungal wheat  
757 pathogen evolved host specialization by extensive chromosomal rearrangements. *The ISME*  
758 *journal* **11**: 1189-1204.
- 759 Higgins, C.F., (2007) Multiple molecular mechanisms for multidrug resistance transporters.  
760 *Nature* **446**: 749-757.
- 761 Hiramatsu, K., Y. Katayama, M. Matsuo, T. Sasaki, Y. Morimoto, A. Sekiguchi & T. Baba,  
762 (2014) Multi-drug-resistant *Staphylococcus aureus* and future chemotherapy. *Journal of*  
763 *infection and chemotherapy : official journal of the Japan Society of Chemotherapy* **20**: 593-  
764 601.
- 765 Hirsch, C.D. & N.M. Springer, (2016) Transposable element influences on gene expression in  
766 plants. *Biochimica et Biophysica Acta (BBA) - Gene Regulatory Mechanisms*: in press.
- 767 Hulvey, J., J.T. Popko, Jr., H. Sang, A. Berg & G. Jung, (2012) Overexpression of  
768 ShCYP51B and ShatrD in *Sclerotinia homoeocarpa* isolates exhibiting practical field  
769 resistance to a demethylation inhibitor fungicide. *Appl Environ Microbiol* **78**: 6674-6682.
- 770 Johnson, J.L., A.K. Raney & A. McLachlan, (1995) Characterization of a functional  
771 hepatocyte nuclear factor 3 binding site in the hepatitis B virus nucleocapsid promoter.  
772 *Virology* **208**: 147-158.
- 773 Kema, G.H., E.C. Verstappen, M. Todorova & C. Waalwijk, (1996) Successful crosses and  
774 molecular tetrad and progeny analyses demonstrate heterothallism in *Mycosphaerella*  
775 *graminicola*. *Current Genetics* **30**: 251-258.
- 776 Kolpakov, R., G. Bana & G. Kucherov, (2003) mreps: Efficient and flexible detection of  
777 tandem repeats in DNA. *Nucleic Acids Res* **31**: 3672-3678.
- 778 Kramer, B., E. Thines & A.J. Foster, (2009) MAP kinase signalling pathway components and  
779 targets conserved between the distantly related plant pathogenic fungi *Mycosphaerella*  
780 *graminicola* and *Magnaporthe grisea*. *Fungal Genetics and Biology* **46**: 667-681.
- 781 Kretschmer, M., M. Leroch, A. Mosbach, A.S. Walker, S. Fillinger, D. Mernke, H.J.  
782 Schoonbeek, J.M. Pradier, P. Leroux, M.A. De Waard & M. Hahn, (2009) Fungicide-driven  
783 evolution and molecular basis of multidrug resistance in field populations of the grey mould  
784 fungus *Botrytis cinerea*. *PLoS Pathog* **5**: e1000696.
- 785 Leeuwen, T.V., P. Demaeght, E.J. Osborne, W. Dermauw, S. Gohlke, R. Nauen, M. Grbić, L.  
786 Tirry, H. Merzendorfer & R.M. Clark, (2012) Population bulk segregant mapping uncovers  
787 resistance mutations and the mode of action of a chitin synthesis inhibitor in arthropods.  
788 *Proceedings of the National Academy of Sciences* **109**: 4407-4412.
- 789 Leroch, M., C. Plesken, R.W. Weber, F. Kauff, G. Scalliet & M. Hahn, (2013) Gray mold  
790 populations in german strawberry fields are resistant to multiple fungicides and dominated by  
791 a novel clade closely related to *Botrytis cinerea*. *Appl Environ Microbiol* **79**: 159-167.
- 792 Leroux, P., F. Chapeland, D. Desbrosses & M. Gredt, (1999) Patterns of cross-resistance to  
793 fungicides in *Botryotinia fuckeliana* (*Botrytis cinerea*) isolates from French vineyards. *Crop*  
794 *Protection* **18**: 687-697.

- 795 Leroux, P., M. Gredt, F. Remuson, A. Micoud & A.S. Walker, (2013) Fungicide resistance  
796 status in French populations of the wheat eyespot fungi *Oculimacula acuformis* and  
797 *Oculimacula yallundae*. *Pest Manag Sci* **69**: 15-26.
- 798 Leroux, P. & A.S. Walker, (2011) Multiple mechanisms account for resistance to sterol  
799 14 $\alpha$ -demethylation inhibitors in field isolates of *Mycosphaerella graminicola*. *Pest Manag*  
800 *Sci* **67**: 44-59.
- 801 Leroux, P. & A.S. Walker, (2013) Activity of fungicides and modulators of membrane drug  
802 transporters in field strains of *Botrytis cinerea* displaying multidrug resistance. *European J*  
803 *Plant Pathol* **135**: 683-693.
- 804 Li, H. & R. Durbin, (2009) Fast and accurate short read alignment with Burrows-Wheeler  
805 transform. *Bioinformatics* **25**: 1754-1760.
- 806 Li, H., B. Handsaker, A. Wysoker, T. Fennell, J. Ruan, N. Homer, G. Marth, G. Abecasis & R.  
807 Durbin, (2009) The Sequence Alignment/Map format and SAMtools. *Bioinformatics* **25**:  
808 2078-2079.
- 809 Liu, S., C.-T. Yeh, H.M. Tang, D. Nettleton & P.S. Schnable, (2012) Gene mapping via  
810 bulked segregant RNA-Seq (BSR-Seq). *PLoS One* **7**: e36406.
- 811 Lucas, J.A., N.J. Hawkins & B.A. Fraaije, (2015) The evolution of fungicide resistance.  
812 *Advances in applied microbiology* **90**: 29-92.
- 813 Luo, C.-X. & G. Schnabel, (2008) The Cytochrome P450 Lanosterol 14 $\alpha$ -Demethylase Gene  
814 Is a Demethylation Inhibitor Fungicide Resistance Determinant in *Monilinia fructicola* Field  
815 Isolates from Georgia. *Applied and Environmental Microbiology* **74**: 359-366.
- 816 Ma, Z., T.J. Proffer, J.L. Jacobs & G.W. Sundin, (2006) Overexpression of the 14 $\alpha$ -  
817 Demethylase Target Gene (CYP51) Mediates Fungicide Resistance in *Blumeriella jaapii*.  
818 *Applied and Environmental Microbiology* **72**: 2581-2585.
- 819 Magwene, P.M., J.H. Willis & J.K. Kelly, (2011) The Statistics of Bulk Segregant Analysis  
820 Using Next Generation Sequencing. *PLoS Comput Biol* **7**: e1002255.
- 821 McKenna, A., M. Hanna, E. Banks, A. Sivachenko, K. Cibulskis, A. Kernytsky, K. Garimella,  
822 D. Altshuler, S. Gabriel, M. Daly & M.A. DePristo, (2010) The Genome Analysis Toolkit: a  
823 MapReduce framework for analyzing next-generation DNA sequencing data. *Genome Res* **20**:  
824 1297-1303.
- 825 Michelmore, R.W., I. Paran & R.V. Kesseli, (1991) Identification of markers linked to  
826 disease-resistance genes by bulked segregant analysis: a rapid method to detect markers in  
827 specific genomic regions by using segregating populations. *Proceedings of the National*  
828 *Academy of Sciences* **88**: 9828-9832.
- 829 Moll, T., L. Dirick, H. Auer, J. Bonkovsky & K. Nasmyth, (1992) SWI6 is a regulatory  
830 subunit of two different cell cycle START-dependent transcription factors in *Saccharomyces*  
831 *cerevisiae*. *Journal of cell science. Supplement* **16**: 87-96.
- 832 Morschhäuser, J., (2010) Regulation of multidrug resistance in pathogenic fungi. *Fungal*  
833 *Genetics and Biology* **47**: 94-106.



- 834 Moye-Rowley, W.S., (2003) Transcriptional control of multidrug resistance in the yeast  
835 *Saccharomyces*. *Prog Nucleic Acid Res Mol Biol* **73**: 251-279.
- 836 Muszewska, A., M. Hoffman-Sommer & M. Grynberg, (2011) LTR Retrotransposons in  
837 Fungi. *PLoS ONE* **6**: e29425.
- 838 Nowrousian, M., I. Teichert, S. Masloff & U. Kuck, (2012) Whole-Genome Sequencing of  
839 *Sordaria macrospora* Mutants Identifies Developmental Genes. *G3 (Bethesda)* **2**: 261-270.
- 840 Omrane, S., H. Sghyer, C. Audéon, C. Lanen, C. Duplaix, A.-S. Walker & S. Fillinger, (2015)  
841 Fungicide efflux and the MgMFS1 transporter contribute to the multidrug resistance  
842 phenotype in *Zymoseptoria tritici* field isolates. *Environmental microbiology* **17**: 2805-2823.
- 843 Paul, S. & W.S. Moye-Rowley, (2014) Multidrug resistance in fungi: regulation of  
844 transporter-encoding gene expression. *Frontiers in physiology* **5**: 143.
- 845 Pfaffl, M.W., A. Tichopad, C. Prgomet & T.P. Neuvians, (2004) Determination of stable  
846 housekeeping genes, differentially regulated target genes and sample integrity: BestKeeper--  
847 Excel-based tool using pair-wise correlations. *Biotechnol Lett* **26**: 509-515.
- 848 Pomraning, K.R., K.M. Smith & M. Freitag, (2011) Bulk segregant analysis followed by  
849 high-throughput sequencing reveals the *Neurospora* cell cycle gene, *ndc-1*, to be allelic with  
850 the gene for ornithine decarboxylase, *spe-1*. *Eukaryot Cell* **10**: 724-733.
- 851 Robinson, J.T., H. Thorvaldsdottir, W. Winckler, M. Guttman, E.S. Lander, G. Getz & J.P.  
852 Mesirov, (2011) Integrative genomics viewer. *Nat Biotech* **29**: 24-26.
- 853 Roohparvar, R., M.A. De Waard, G.H.J. Kema & L.H. Zwieters, (2007) MgMfs1, a major  
854 facilitator superfamily transporter from the fungal wheat pathogen *Mycosphaerella*  
855 *graminicola*, is a strong protectant against natural toxic compounds and fungicides. *Fungal*  
856 *Genetics and Biology* **44**: 378-388.
- 857 Roohparvar, R., R. Mehrabi, J.G.M. Van Nistelrooy, L.H. Zwieters & M.A. De Waard, (2008)  
858 The drug transporter MgMfs1 can modulate sensitivity of field strains of the fungal wheat  
859 pathogen *Mycosphaerella graminicola* to the strobilurin fungicide trifloxystrobin. *Pest Manag*  
860 *Sci* **64**: 685-693.
- 861 Rupp, S., R.W. Weber, D. Rieger, P. Detzel & M. Hahn, (2016) Spread of *Botrytis cinerea*  
862 Strains with Multiple Fungicide Resistance in German Horticulture. *Front Microbiol* **7**: 2075.
- 863 Sang, H., J. Hulvey, J.T. Popko, J. Lopes, A. Swaminathan, T. Chang & G. Jung, (2015) A  
864 pleiotropic drug resistance transporter is involved in reduced sensitivity to multiple fungicide  
865 classes in *Sclerotinia homoeocarpa* (F.T. Bennett). *Mol Plant Pathol* **16**: 251-261.
- 866 Schnabel, G. & A.L. Jones, (2001) The 14 $\alpha$ -Demethylase(CYP51A1) Gene is  
867 Overexpressed in *Venturia inaequalis* Strains Resistant to Myclobutanil. *Phytopathology* **91**:  
868 102-110.
- 869 Suffert, F., I. Sache & C. Lannou, (2011) Early stages of septoria tritici blotch epidemics of  
870 winter wheat: build-up, overseasoning, and release of primary inoculum. *Plant Pathol* **60**:  
871 166-177.

872 Sun, X., Q. Xu, R. Ruan, T. Zhang, C. Zhu & H. Li, (2013) PdMLE1, a specific and active  
873 transposon acts as a promoter and confers *Penicillium digitatum* with DMI resistance.  
874 *Environmental microbiology reports* **5**: 135-142.

875 Teer, J.K., E.D. Green, J.C. Mullikin & L.G. Biesecker, (2012) VarSifter: visualizing and  
876 analyzing exome-scale sequence variation data on a desktop computer. *Bioinformatics* **28**:  
877 599-600.

878 Torriani, S.F., J.P. Melichar, C. Mills, N. Pain, H. Sierotzki & M. Courbot, (2015)  
879 *Zymoseptoria tritici*: A major threat to wheat production, integrated approaches to control.  
880 *Fungal Genet Biol* **79**: 8-12.

881 Verma, R., J. Smiley, B. Andrews & J.L. Campbell, (1992) Regulation of the yeast DNA  
882 replication genes through the Mlu I cell cycle box is dependent on SWI6. *Proc Natl Acad Sci*  
883 *U S A* **89**: 9479-9483.

884 Villani, S.M., J. Hulvey, J.M. Hily & K.D. Cox, (2016) Overexpression of the CYP51A1  
885 Gene and Repeated Elements are Associated with Differential Sensitivity to DMI Fungicides  
886 in *Venturia inaequalis*. *Phytopathology* **106**: 562-571.

887 Waalwijk, C., O. Mendes, E.C.P. Verstappen, M.A. de Waard & G.H.J. Kema, (2002)  
888 Isolation and Characterization of the Mating-Type Idiomorphs from the Wheat Septoria Leaf  
889 Blotch Fungus *Mycosphaerella graminicola*. *Fungal Genetics and Biology* **35**: 277-286.

890 Wagner, B.J., T.E. Hayes, C.J. Hoban & B.H. Cochran, (1990) The SIF binding element  
891 confers sis/PDGF inducibility onto the c-fos promoter. *The EMBO Journal* **9**: 4477-4484.

892 Walker, A.-S., A. Micoud, F. Rémuson, J. Grosman, M. Gredt & P. Leroux, (2013) French  
893 vineyards provide information that opens ways for effective resistance management of  
894 *Botrytis cinerea* (grey mould). *Pest Manag Sci* **69**: 667-678.

895 Wong, A., (2017) Epistasis and the Evolution of Antimicrobial Resistance. *Front Microbiol* **8**:  
896 246.

897 Wu, Q., Z. Yang, Y. Nie, Y. Shi & D. Fan, (2014) Multi-drug resistance in cancer  
898 chemotherapeutics: mechanisms and lab approaches. *Cancer letters* **347**: 159-166.

899 Yoshida, K., D.G. Saunders, C. Mitsuoka, S. Natsume, S. Kosugi, H. Saitoh, Y. Inoue, I.  
900 Chuma, Y. Tosa, L.M. Cano, S. Kamoun & R. Terauchi, (2016) Host specialization of the  
901 blast fungus *Magnaporthe oryzae* is associated with dynamic gain and loss of genes linked to  
902 transposable elements. *BMC Genomics* **17**: 370.

903 Zhong, Z., T.C. Marcel, F.E. Hartmann, X. Ma, C. Plissonneau, M. Zala, A. Ducasse, J.  
904 Confais, J. Compain, N. Lapalu, J. Amselem, B.A. McDonald, D. Croll & J. Palma-Guerrero,  
905 (2017) A small secreted protein in *Zymoseptoria tritici* is responsible for avirulence on wheat  
906 cultivars carrying the *Stb6* resistance gene. *The New phytologist* **214**: 619-631.

907
